# Supplementary material for: Transposable element islands facilitate adaptation to novel environments in an invasive species
Source: PubMed Central journal article supplement (PMC4284661; doi:10.1038/ncomms6495), 2014-12-16
Supplement: ncomms6495-s1.pdf [file ncomms6495-s1.pdf]

## Supplementary Figures

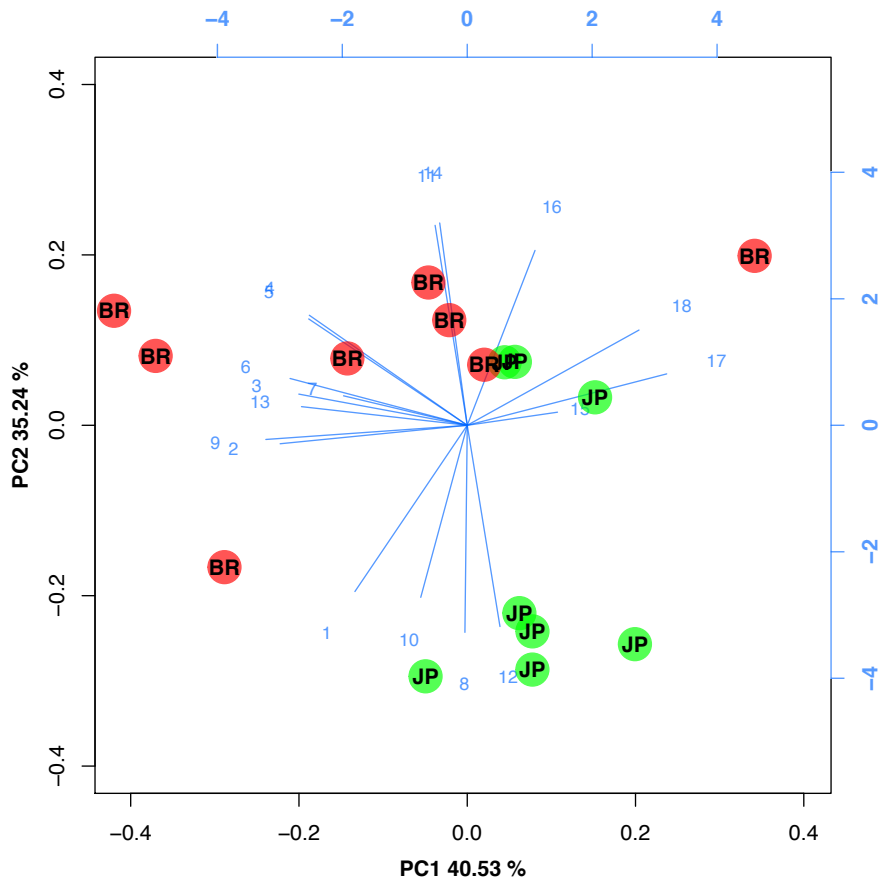

Supplementary Figure 1a: PCA plot of 22 Aitchison-transformed peak-areas

PC1 explains 40.53 % of the variance in the data matrix. Blue lines denote peak number.

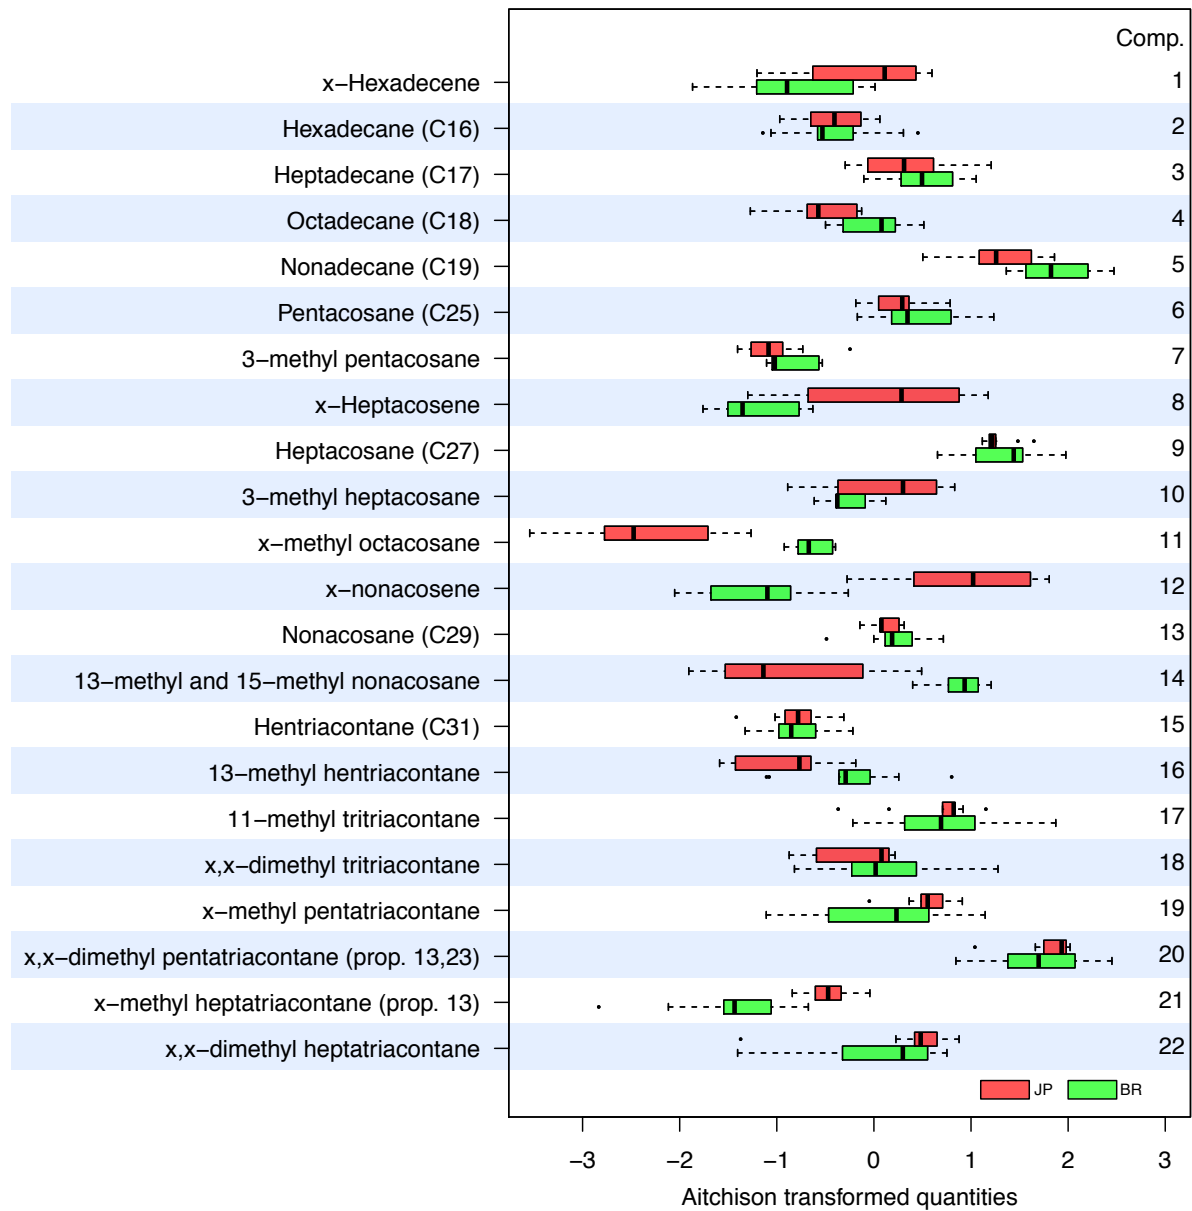

Supplementary Figure 1b: Boxplot of relative compound abundance in each lineage

Boxplot of relative compound abundance in each lineage. 'x' denotes unknown position of the double bond or methyl branch. Compound 14 could not be separated with the GC parameters used.

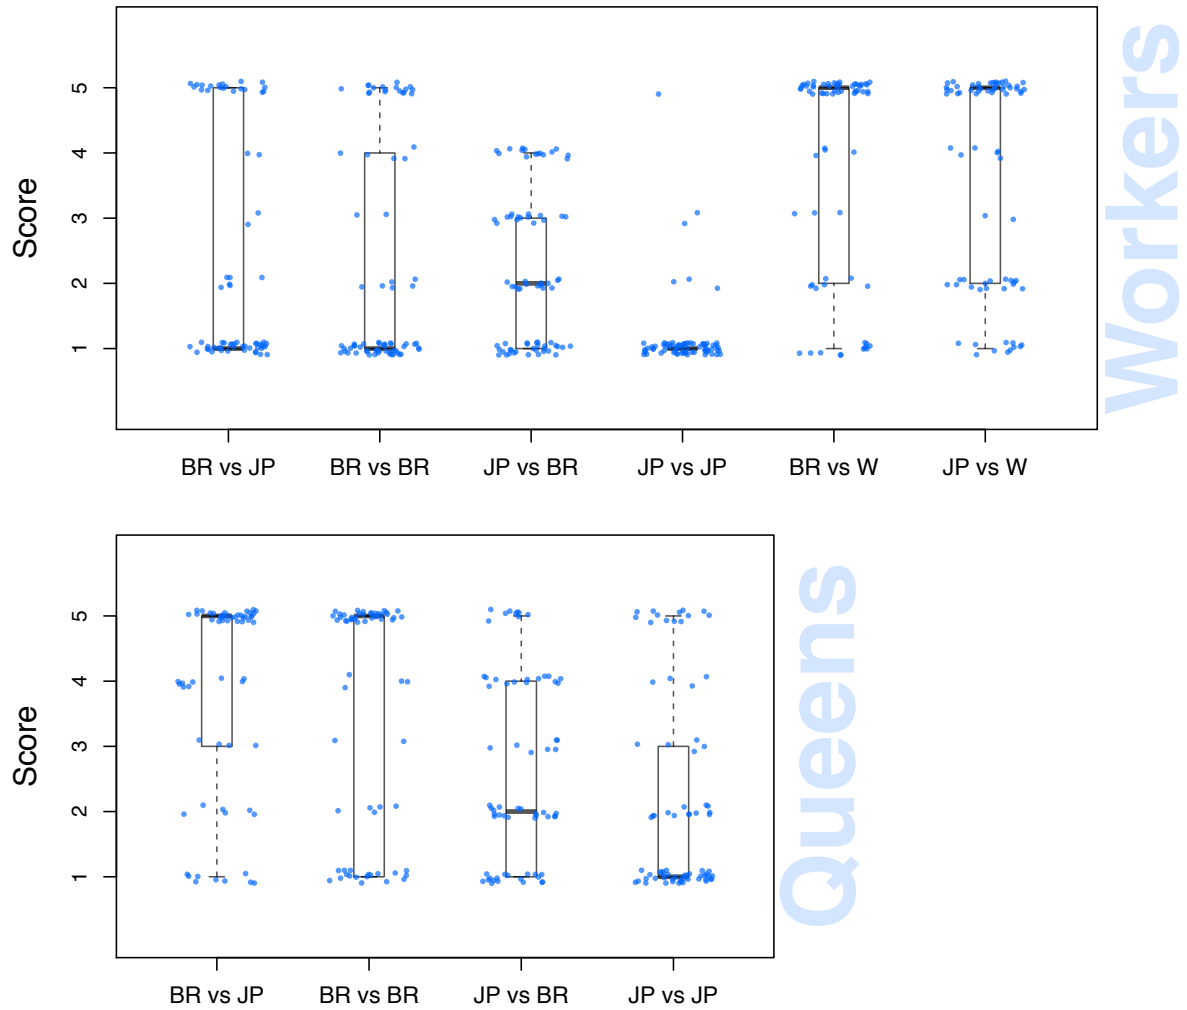

Supplementary Figure 2: Aggression indices in behavioral assay

Workers (top) and queens (bottom) of each lineage (and workers of *W. auropunctata*) were introduced to experimental colonies of either JP or BR. We scored the behavior of the receiving colony based on defined aggression indices and tested for significant differences in potential for high aggressiveness between each of the tested combinations (origin of receiving colony vs. origin of the introduced ant) in a generalized linear model.

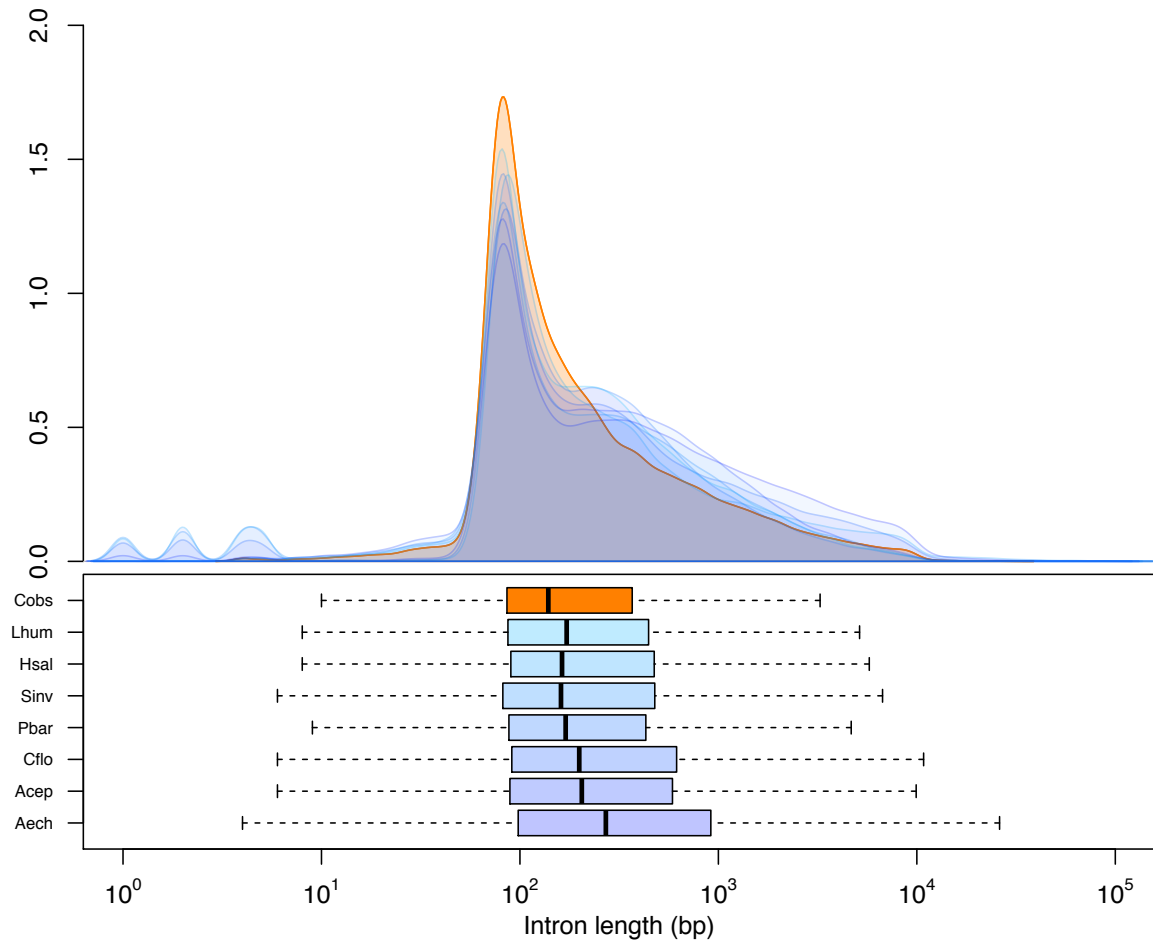

Supplementary Figure 3: Density plot of intron lengths for the sequenced ant genomes

The density plots for intron lengths in *C. obscurior* and seven other published ant genomes show that while the distribution is bimodal in other genomes, the introns of *C. obscurior* deviate from this pattern, with a single peak and a median intron length of 139 bp.

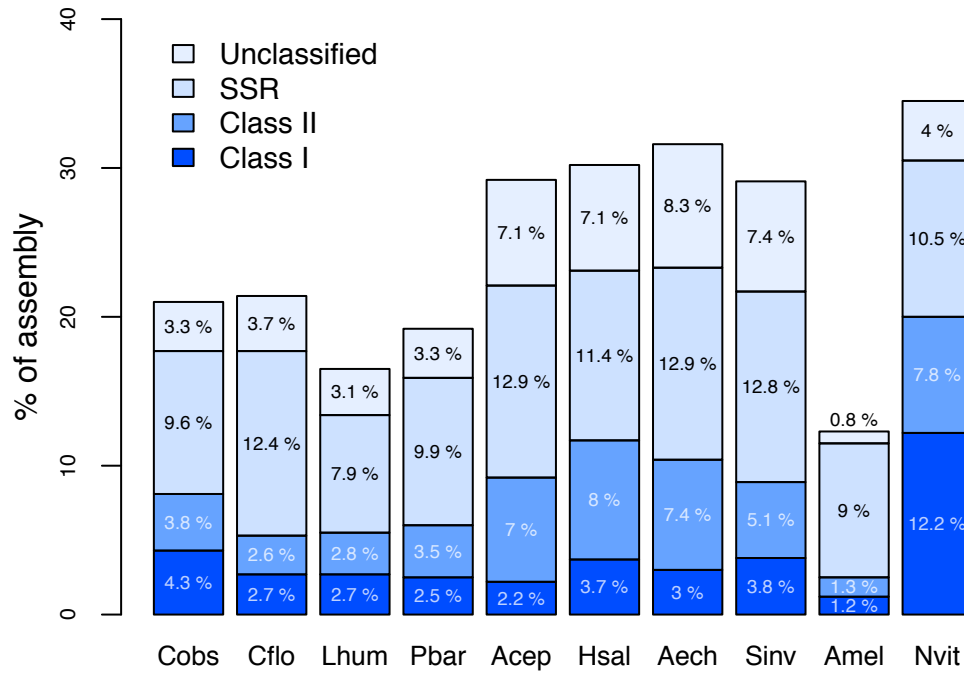

Supplementary Figure 4: Repeat content in sequenced ant genomes relative to assembled genome size

Relative repeat content of *C. obscurior* and nine hymenopteran genomes as calculated from the repeat annotations presented in this study. Across the analyzed ant genomes, repeat content ranges between 16.5 % in *L. humile* to 31.5 % in *A. echinator*. Relative class I content is higher in *C. obscurior* (4.3 %) than in any of the other ant genomes, yet overall relative repeat content is not different from the smaller genomes (*Cflo*, *Lhum*, *Pbar*). The genomes of *A. mellifera* (*Amel*) and *N. vitripennis* (*Nvit*) are distinct from the analyzed ant genomes in having either much less (*Amel*) or much more (*Nvit*) annotated TEs. SSR = Short simple repeats.

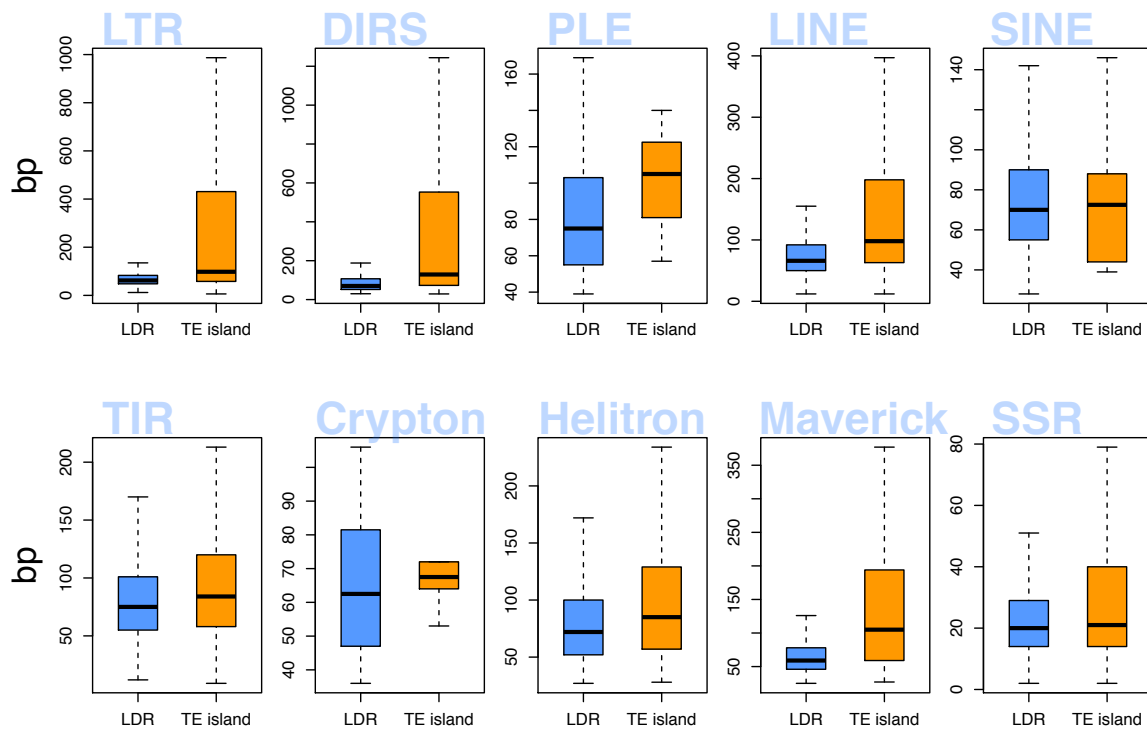

Supplementary Figure 5: Length polymorphism in TE superfamilies and simple repeats between LDRs and TE islands

Length polymorphism in TE superfamilies and simple repeats between LDRs and TE islands. Median element length for all analyzed superfamilies is higher in TE islands than LDRs, suggesting local differences in TE dynamics.

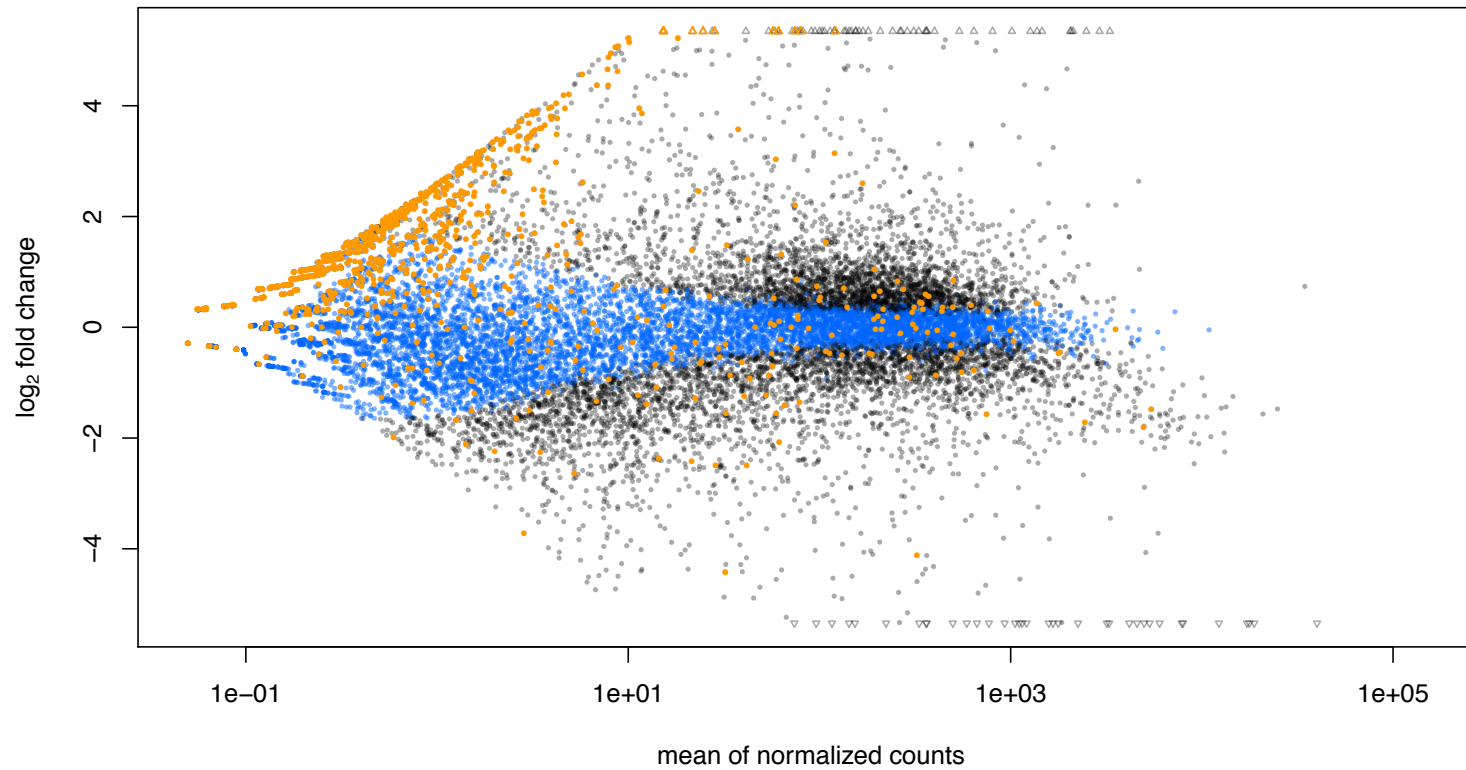

Supplementary Figure 6: MA plot for differential expression of genes between 3<sup>rd</sup> instar larvae and queens

MA plot for differential expression of genes between 3<sup>rd</sup> instar larvae and queens. Log ratios of expression of each gene is plotted against the log mean average expression across all samples. Black dots represent genes with significantly different expression. Blue dots show genes that are not significantly different expressed. Genes located in TE islands are plotted in orange. Most TE island genes appear to be more strongly expressed in queens than larvae, while the overall expression of TE island genes is low.

a)

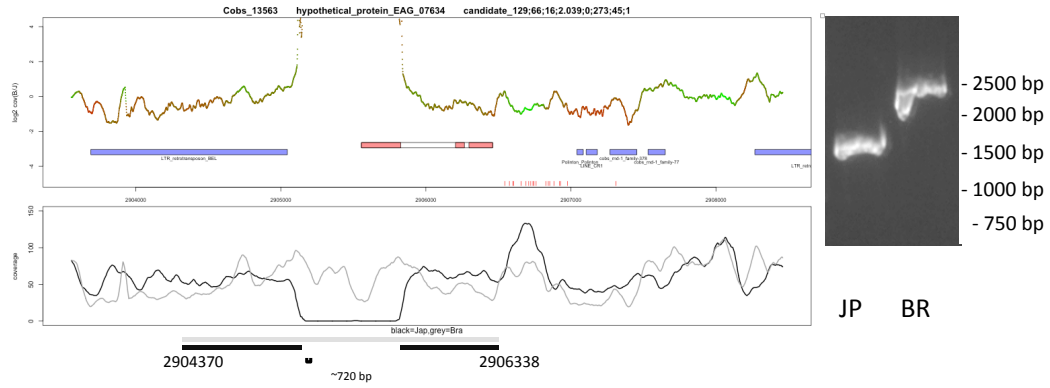

b)

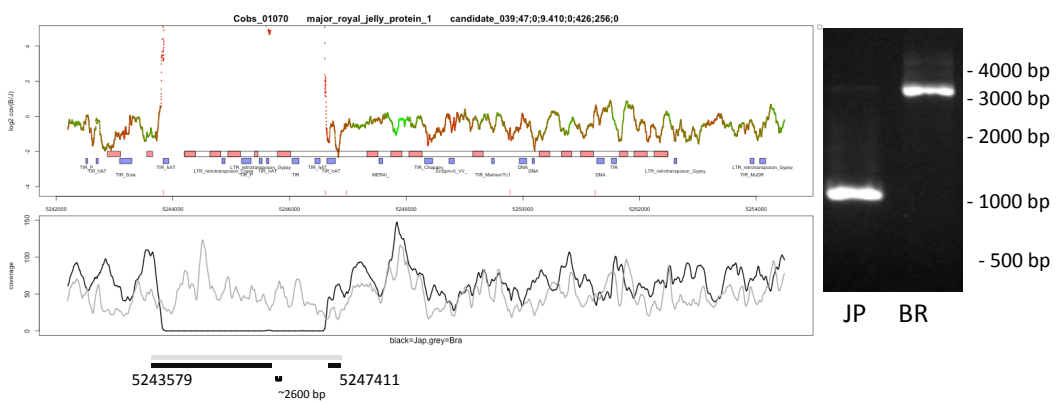

c)

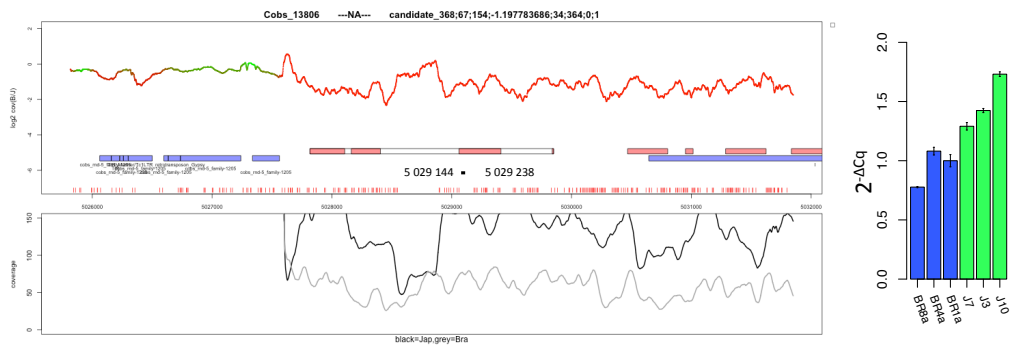

d)

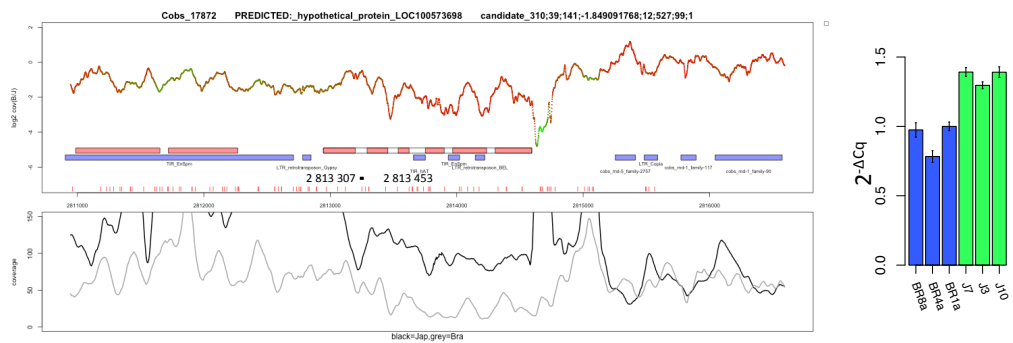



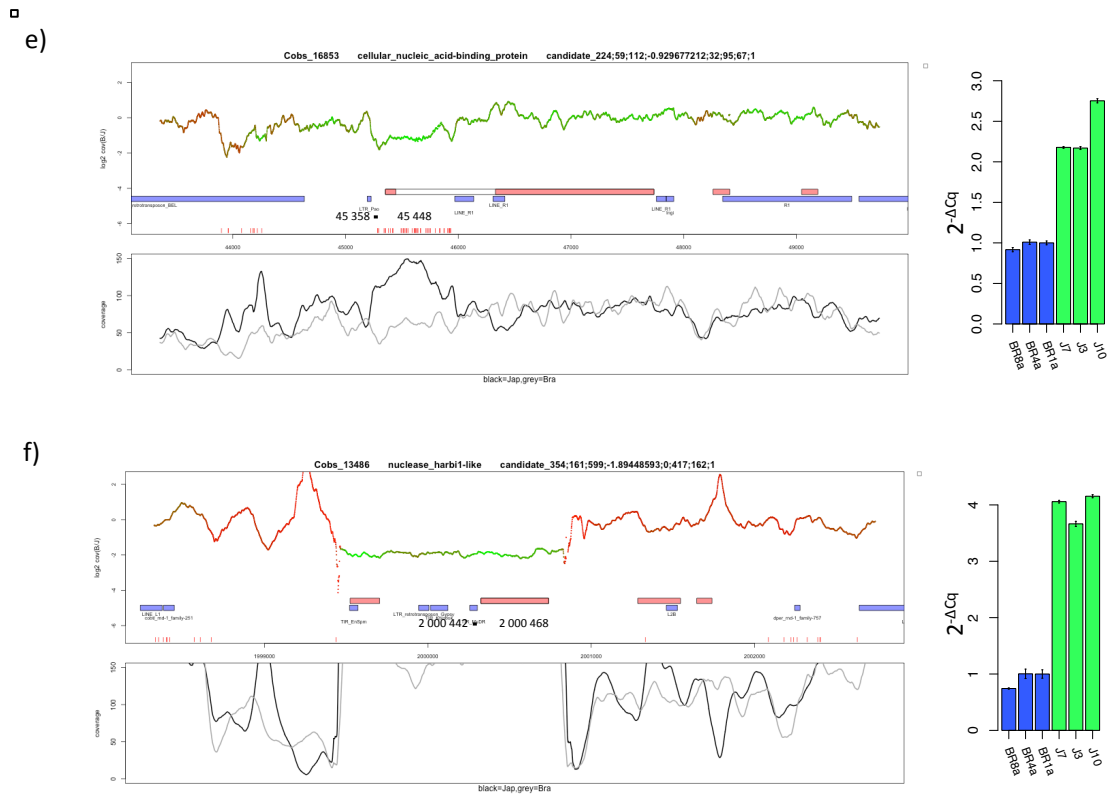

**Supplementary Figure 7: Diagnostic plots and experimental confirmation for two deletion candidates (a, b) and four duplication candidates (c-f).** Diagnostic plots were created for each of the 512 candidate loci by plotting the log<sub>2</sub> JP/BR coverage ratio (red to green), gene models (red boxes), repetitive elements (blue boxes), heterozygous SNV calls (red ticks), and the absolute coverage (grey = BR; black = JP, lower panel). A) Partial deletion of *Cobs\_13563* in the JP lineage. PCR and Sanger sequencing confirmed deletion of ~720 bp in the JP genome. B) Deletion of a *MRJP* in *Cobs\_01070* in the JP lineage. PCR and Sanger sequencing confirmed deletion of ~2600 bp in the JP genome. C-F) Duplications in *Cobs\_13806* (c), *Cobs\_17872* (d), *Cobs\_16853* (e), and *Cobs\_13486* (f) as confirmed by real-time qPCR.  $2^{-\Delta Cq}$  values for BR (blue) and JP samples (green) were normalized against colony BR1a. Primer combinations used: *Cobs\_13563*: fw: 5'-CAGTTCGGGATGGCGCTC-3', rv: 5'-CGAAAGACTGGGGCTGCAA-3'; *Cobs\_01070*: fw: 5'-TCCCGTCAAACCAATCGCAACTCG-3', rv: 5'-TGGGTTGCATCAGGCCACGTA-3'; *Cobs\_13806*: fw: 5'-GCAACGGTGCTCACAGGAGCC-3', rv: 5'-AAAGGCGATGCCCTCCGTTGC-3'; *Cobs\_17872*: fw: 5'-TCGTAGACGATTATATAGAGCG-3', rv: 5'-GTAGCAGAAGTAGAAGGCATTGG-3'; *Cobs\_13486*: fw: 5'-TCATTGACATCGAATTCGTCATGGCTG-3', rv: 5'-AACGTGTAATGGCTGCTGCTATACTTC-3'; *Cobs\_16853*: fw: 5'-GCGACGTCGAGATAAAGTTTCG-3', rv: 5'-CGTTAATTGGTAGGGTTTCGC-3'.

## Supplementary Tables

Supplementary Table 1: 22 compounds in cuticle extracts of BR and JP used for statistics

| ID | Compound                                    |
|----|---------------------------------------------|
| 1  | x-Hexadecene                                |
| 2  | Hexadecane (C16)                            |
| 3  | Heptadecane (C17)                           |
| 4  | Octadecane (C18)                            |
| 5  | Nonadecane (C19)                            |
| 6  | Pentacosane (C25)                           |
| 7  | 3-methyl pentacosane                        |
| 8  | x-Heptacosene                               |
| 9  | Heptacosane (C27)                           |
| 10 | 3-methyl heptacosane                        |
| 11 | x-methyl octacosane                         |
| 12 | x-nonacosene                                |
| 13 | Nonacosane (C29)                            |
| 14 | 13-methyl and 15-methyl nonacosane          |
| 15 | Hentriacontane (C31)                        |
| 16 | 13-methyl hentriacontane                    |
| 17 | 11-methyl tritriacontane                    |
| 18 | x,x-dimethyl tritriacontane                 |
| 19 | x-methyl pentatriacontane                   |
| 20 | x,x-dimethyl pentatriacontane (prop. 13,23) |
| 21 | x-methyl heptatriacontane (prop. 13)        |
| 22 | x,x-dimethyl heptatriacontane               |

Supplementary Table 2: Data used for the *C. obscurior* draft genome assembly. Genome coverage computed assuming 195 Mb estimated genome size

|                                | No. of reads | Average length (bp) | Genome coverage |
|--------------------------------|--------------|---------------------|-----------------|
| 220 bp Illumina paired end     | 209 740 014  | 100                 | 105x            |
| 8 Kb paired end (reads)        | 1 318 264    | 189                 | 1.2x            |
| 8 Kb paired end (valid pairs)  | 416 174      |                     |                 |
| 20 Kb paired end (reads)       | 1 131 046    | 194                 | 1.1x            |
| 20 Kb paired end (valid pairs) | 326 815      |                     |                 |

Supplementary Table 3: Quantitative assembly statistics for Cobs1.4

|                                                 |             |
|-------------------------------------------------|-------------|
| <b>Scaffolded sequence (bp)</b>                 | 177 892 999 |
| <b>N50 scaffold size (bp)</b>                   | 3 105 814   |
| <b>Total number of scaffolds</b>                | 1 854       |
| <b>GC content</b>                               | 0.3958      |
| <b>Total no. of annotated genes</b>             | 17 552      |
| <b>Total no. of gene models with AED&lt;0.5</b> | 12 752      |
| <b>Total no. of genes with Interpro domain</b>  | 9 552       |
| <b>Scaffolded sequence (bp)</b>                 | 177 892 999 |

Supplementary Table 4: Comparison of gene body, exon and intron structure of *C. obscurior* and other analyzed ant genomes

| Species              | Gene Body          |                    |       |               | Exon               |                    |       |               | Intron             |                    |       |               |
|----------------------|--------------------|--------------------|-------|---------------|--------------------|--------------------|-------|---------------|--------------------|--------------------|-------|---------------|
|                      | Median length (bp) | Total length (Mbp) | Count | % of assembly | Median length (bp) | Total length (Mbp) | Count | % of assembly | Median length (bp) | Total length (Mbp) | Count | % of assembly |
| <i>C. floridanus</i> | 1790               | 71.85              | 17059 | 29.94%        | 179                | 20.75              | 83401 | 8.64%         | 199                | 51.10              | 66342 | 21.29%        |
| <i>P. barbatus</i>   | 1838               | 52.51              | 17152 | 22.34%        | 180                | 20.49              | 81657 | 8.72%         | 170                | 32.03              | 64504 | 13.63%        |
| <i>H. saltator</i>   | 1273               | 72.33              | 18561 | 24.35%        | 184                | 20.41              | 78601 | 6.87%         | 163                | 51.91              | 60040 | 17.48%        |
| <i>L. humile</i>     | 2068               | 54.00              | 16097 | 25.04%        | 181                | 20.48              | 80622 | 9.50%         | 172                | 33.52              | 64525 | 15.55%        |
| <i>S. invicta</i>    | 1365               | 44.30              | 16522 | 12.55%        | 182                | 17.25              | 66992 | 4.89%         | 161                | 27.06              | 50470 | 7.66%         |
| <i>A. echinator</i>  | 2783               | 92.35              | 17278 | 30.78%        | 180                | 21.00              | 85030 | 7.00%         | 271                | 71.35              | 67752 | 23.78%        |
| <i>A. cephalotes</i> | 1932               | 59.72              | 18090 | 18.84%        | 169                | 19.53              | 83900 | 6.16%         | 205                | 40.19              | 65810 | 12.68%        |
| <i>C. obscurior</i>  | 1844               | 60.35              | 17552 | 33.92%        | 171                | 22.14              | 92173 | 12.45%        | 139                | 38.21              | 74621 | 21.48%        |

Supplementary Table 5: Relative content (%) of repetitive elements and TEs in the genomes of *C. obscurior* and other Hymenoptera

| Type | Repeat       | Cobs         | Cflo  | Lhum  | Pbar  | Acep  | Hsal  | Aech  | Sinv  | Amel  | Nvit  |
|------|--------------|--------------|-------|-------|-------|-------|-------|-------|-------|-------|-------|
| LTR  | Gypsy        | <b>1.643</b> | 0.94  | 1     | 1.247 | 0.725 | 1.284 | 0.901 | 1.216 | 0.389 | 4.754 |
| LTR  | Copia        | 0.369        | 0.227 | 0.247 | 0.179 | 0.147 | 0.348 | 0.2   | 0.4   | 0.131 | 0.957 |
| LTR  | BEL          | <b>0.499</b> | 0.244 | 0.264 | 0.151 | 0.158 | 0.206 | 0.266 | 0.485 | 0.061 | 0.488 |
| LTR  | DIRS         | <b>0.095</b> | 0.008 | 0.072 | 0.027 | 0.018 | 0.065 | 0.019 | 0.072 | 0.003 | 0.089 |
| LTR  | Ngaro        | <b>0.018</b> | 0     | 0     | 0     | 0     | 0     | 0     | 0     | 0     | 0     |
| LTR  | Pao          | 0.033        | 0.034 | 0.099 | 0.024 | 0.083 | 0.023 | 0.206 | 0.02  | 0.043 | 0.167 |
| LTR  | ERV1         | 0.081        | 0.056 | 0.021 | 0.061 | 0.079 | 0.093 | 0.09  | 0.074 | 0.045 | 0.055 |
| LTR  | ERV2         | <b>0.041</b> | 0.027 | 0.01  | 0.025 | 0.019 | 0.037 | 0.022 | 0.02  | 0.024 | 0.027 |
| LTR  | ERV3         | 0.01         | 0.007 | 0.002 | 0.007 | 0.006 | 0.01  | 0.007 | 0.006 | 0.006 | 0.008 |
| LTR  | ERVK         | 0            | 0     | 0     | 0     | 0     | 0     | 0     | 0     | 0     | 0.146 |
| LTR  | ERVL         | 0            | 0.001 | 0.001 | 0     | 0     | 0.004 | 0     | 0     | 0     | 0     |
| LTR  | Unclassified | 0.307        | 0.392 | 0.152 | 0.089 | 0.162 | 0.202 | 0.257 | 0.358 | 0.142 | 1.558 |
| LINE | CR1          | <b>0.232</b> | 0.091 | 0.035 | 0.061 | 0.059 | 0.156 | 0.063 | 0.121 | 0.073 | 1.349 |
| LINE | L1           | <b>0.163</b> | 0.071 | 0.022 | 0.063 | 0.057 | 0.136 | 0.065 | 0.057 | 0.067 | 0.113 |
| LINE | L2           | 0.034        | 0.025 | 0.034 | 0.035 | 0.113 | 0.025 | 0.196 | 0.061 | 0.007 | 0.093 |
| LINE | L2A          | <b>0.002</b> | 0     | 0     | 0     | 0     | 0.001 | 0     | 0     | 0     | 0.001 |
| LINE | L2B          | 0.007        | 0.004 | 0.002 | 0.021 | 0.002 | 0.009 | 0.003 | 0.009 | 0.001 | 0.004 |
| LINE | Jockey       | 0.033        | 0.038 | 0.022 | 0.02  | 0.016 | 0.04  | 0.02  | 0.023 | 0.01  | 0.034 |
| LINE | LOA          | 0.046        | 0.006 | 0.088 | 0.017 | 0.007 | 0.01  | 0.007 | 0.068 | 0.003 | 0.303 |
| LINE | R1           | 0.199        | 0.144 | 0.255 | 0.119 | 0.065 | 0.667 | 0.136 | 0.315 | 0.02  | 0.253 |
| LINE | R2           | <b>0.032</b> | 0.008 | 0.014 | 0.006 | 0.003 | 0.023 | 0.004 | 0.014 | 0.007 | 0.034 |
| LINE | R4           | 0.015        | 0.008 | 0.008 | 0.008 | 0.007 | 0.009 | 0.007 | 0.007 | 0.012 | 0.012 |
| LINE | RTEX         | <b>0.007</b> | 0.004 | 0.003 | 0.005 | 0.003 | 0.003 | 0.002 | 0.006 | 0.001 | 0.01  |
| LINE | Penelope     | 0.04         | 0.071 | 0.068 | 0.097 | 0.221 | 0.035 | 0.269 | 0.12  | 0.01  | 0.113 |
| LINE | RTE          | 0.149        | 0.088 | 0.146 | 0.087 | 0.071 | 0.147 | 0.083 | 0.182 | 0.047 | 0.243 |
| LINE | CRE          | <b>0.005</b> | 0.002 | 0     | 0.002 | 0.001 | 0.003 | 0.001 | 0.001 | 0.001 | 0.003 |
| LINE | NeSL         | <b>0.033</b> | 0.011 | 0.005 | 0.009 | 0.009 | 0.01  | 0.006 | 0.004 | 0.009 | 0.016 |
| LINE | Rex1         | 0.002        | 0.003 | 0.003 | 0.002 | 0.001 | 0.009 | 0.001 | 0.025 | 0.008 | 0.002 |
| LINE | RandI        | 0.001        | 0.001 | 0.001 | 0.001 | 0.001 | 0.001 | 0.001 | 0.001 | 0.001 | 0.002 |
| LINE | Tx1          | <b>0.019</b> | 0.007 | 0.001 | 0.007 | 0.006 | 0.014 | 0.007 | 0.005 | 0.006 | 0.012 |
| LINE | Crack        | <b>0.035</b> | 0.006 | 0.001 | 0.005 | 0.007 | 0.021 | 0.007 | 0.006 | 0.006 | 0.018 |
| LINE | Nimb         | 0.006        | 0.004 | 0.002 | 0.003 | 0.002 | 0.011 | 0.004 | 0.008 | 0.003 | 0.008 |
| LINE | Proto1       | 0.005        | 0.001 | 0     | 0.002 | 0.002 | 0.005 | 0.001 | 0.001 | 0.002 | 0.004 |
| LINE | Proto2       | <b>0.003</b> | 0.001 | 0     | 0.001 | 0.001 | 0.002 | 0.001 | 0.001 | 0.001 | 0.002 |
| LINE | Hero         | 0            | 0     | 0     | 0     | 0     | 0     | 0     | 0     | 0     | 0     |
| LINE | Tad1         | 0            | 0     | 0     | 0     | 0     | 0     | 0     | 0.003 | 0     | 0     |
| LINE | Ingi         | 0.001        | 0.001 | 0.002 | 0.001 | 0     | 0.002 | 0.001 | 0.001 | 0.001 | 0.003 |
| LINE | Outcast      | <b>0.007</b> | 0.002 | 0     | 0.001 | 0.002 | 0.004 | 0.003 | 0.002 | 0.004 | 0.006 |
| LINE | Daphne       | <b>0.002</b> | 0.001 | 0     | 0     | 0     | 0.001 | 0     | 0.001 | 0     | 0.001 |
| LINE | Ambal        | 0.001        | 0.001 | 0     | 0.001 | 0.001 | 0.001 | 0.001 | 0     | 0.001 | 0     |
| LINE | Vingi        | 0.001        | 0     | 0     | 0.001 | 0.001 | 0.001 | 0     | 0     | 0     | 0.001 |
| LINE | I            | <b>0.05</b>  | 0.047 | 0.039 | 0.023 | 0.027 | 0.022 | 0.025 | 0.049 | 0.008 | 1.136 |
| LINE | DRE          | 0.001        | 0.001 | 0.002 | 0     | 0     | 0     | 0     | 0     | 0.001 | 0.002 |

|                      |                |              |       |       |       |       |       |       |       |       |       |
|----------------------|----------------|--------------|-------|-------|-------|-------|-------|-------|-------|-------|-------|
| LINE                 | telomeric      | 0.007        | 0.004 | 0.012 | 0.004 | 0.003 | 0.013 | 0.003 | 0.003 | 0.002 | 0.016 |
| LINE                 | Unclassified   | <b>0.015</b> | 0.006 | 0.006 | 0.005 | 0.008 | 0.013 | 0.006 | 0.005 | 0.006 | 0.038 |
| SINE                 | SINE1_7SL      | 0            | 0     | 0     | 0     | 0     | 0     | 0     | 0     | 0     | 0     |
| SINE                 | SINE2_trna     | 0.012        | 0.058 | 0.004 | 0.009 | 0.003 | 0.006 | 0.004 | 0.003 | 0.002 | 0.014 |
| SINE                 | SINE3_5S       | 0.001        | 0.001 | 0.001 | 0.002 | 0.001 | 0.037 | 0.001 | 0.002 | 0.002 | 0.002 |
| SINE                 | SINE_MIR       | 0            | 0.035 | 0.064 | 0.012 | 0.006 | 0.001 | 0.005 | 0     | 0.001 | 0     |
| SINE                 | SINE_B4        | 0            | 0     | 0     | 0     | 0     | 0     | 0     | 0     | 0     | 0.006 |
| SINE                 | SINE_RTE       | 0            | 0     | 0     | 0.001 | 0     | 0     | 0     | 0     | 0     | 0     |
| SINE                 | SINE_L1        | 0            | 0     | 0     | 0     | 0     | 0.001 | 0     | 0.001 | 0     | 0     |
| SINE                 | SINE_R1        | 0            | 0     | 0     | 0     | 0     | 0     | 0     | 0     | 0     | 0.013 |
| SINE                 | Unclassified   | 0.023        | 0.017 | 0.006 | 0.027 | 0.048 | 0.022 | 0.05  | 0.018 | 0.009 | 0.024 |
| Unclassified classI  |                | <b>0.02</b>  | 0.008 | 0.002 | 0.007 | 0.01  | 0.016 | 0.012 | 0.01  | 0.007 | 0.02  |
| TIR                  | hAT            | <b>0.554</b> | 0.219 | 0.188 | 0.251 | 0.403 | 0.501 | 0.447 | 0.399 | 0.152 | 0.392 |
| TIR                  | Mariner        | 0.346        | 0.285 | 0.255 | 0.561 | 1.527 | 2.283 | 1.454 | 0.623 | 0.297 | 0.279 |
| TIR                  | MuDR           | <b>0.262</b> | 0.072 | 0.027 | 0.053 | 0.06  | 0.167 | 0.059 | 0.05  | 0.071 | 0.157 |
| TIR                  | EnSpm          | <b>0.531</b> | 0.256 | 0.277 | 0.302 | 0.236 | 0.487 | 0.253 | 0.324 | 0.153 | 0.65  |
| TIR                  | piggyBac       | 0.032        | 0.014 | 0.009 | 0.006 | 0.01  | 0.042 | 0.01  | 0.017 | 0.023 | 0.018 |
| TIR                  | P              | <b>0.123</b> | 0.049 | 0.071 | 0.021 | 0.025 | 0.08  | 0.031 | 0.063 | 0.02  | 0.076 |
| TIR                  | Merlin         | 0.01         | 0.003 | 0.002 | 0.008 | 0.013 | 0.012 | 0.014 | 0.006 | 0.002 | 0.003 |
| TIR                  | Harbinger      | <b>0.073</b> | 0.028 | 0.013 | 0.021 | 0.019 | 0.05  | 0.02  | 0.021 | 0.022 | 0.047 |
| TIR                  | Transib        | 0.063        | 0.028 | 0.037 | 0.015 | 0.019 | 0.174 | 0.02  | 0.035 | 0.015 | 0.09  |
| TIR                  | Novosib        | 0.002        | 0.001 | 0.001 | 0.001 | 0.001 | 0.009 | 0.001 | 0.001 | 0.001 | 0.007 |
| TIR                  | Mirage         | 0.001        | 0.001 | 0     | 0     | 0.001 | 0.001 | 0     | 0     | 0     | 0.001 |
| TIR                  | Rehavkus       | <b>0.041</b> | 0.028 | 0.02  | 0.009 | 0.007 | 0.024 | 0.009 | 0.034 | 0.005 | 0.084 |
| TIR                  | Kolobok        | 0.058        | 0.031 | 0.034 | 0.019 | 0.023 | 0.045 | 0.034 | 0.078 | 0.006 | 0.278 |
| TIR                  | ISL2EU         | <b>0.011</b> | 0.002 | 0.001 | 0.001 | 0.002 | 0.005 | 0.001 | 0.002 | 0.002 | 0.008 |
| TIR                  | Chapaev        | 0.072        | 0.08  | 0.031 | 0.089 | 0.137 | 0.253 | 0.18  | 0.144 | 0.02  | 0.126 |
| TIR                  | Crypton        | <b>0.002</b> | 0.001 | 0     | 0     | 0     | 0.001 | 0.001 | 0.001 | 0     | 0.035 |
| TIR                  | Sola           | 0.105        | 0.117 | 0.101 | 0.034 | 0.083 | 0.788 | 0.099 | 0.187 | 0.027 | 0.212 |
| TIR                  | Zator          | 0.009        | 0.002 | 0     | 0.002 | 0.002 | 0.005 | 0.002 | 0.003 | 0.002 | 0.006 |
| TIR                  | Ginger1        | 0.039        | 0.015 | 0.004 | 0.007 | 0.01  | 0.035 | 0.011 | 0.007 | 0.009 | 0.026 |
| TIR                  | Ginger2/TDD    | <b>0.022</b> | 0.004 | 0.001 | 0.003 | 0.003 | 0.009 | 0.004 | 0.004 | 0.005 | 0.01  |
| TIR                  | Academ         | 0.011        | 0.008 | 0.026 | 0.001 | 0.004 | 0.008 | 0.004 | 0.018 | 0.002 | 0.024 |
| TIR                  | Other TIR      | 0.867        | 1.001 | 1.369 | 1.168 | 3.764 | 2.283 | 4.034 | 2.808 | 0.359 | 0.824 |
| MITE                 | MITE           | 0            | 0     | 0     | 0     | 0     | 0     | 0     | 0     | 0     | 0     |
| Helitron             | Helitron       | <b>0.235</b> | 0.099 | 0.078 | 0.127 | 0.08  | 0.181 | 0.09  | 0.071 | 0.07  | 2.938 |
| Polinton             | Polinton       | 0.325        | 0.158 | 0.224 | 0.822 | 0.509 | 0.408 | 0.543 | 0.226 | 0.051 | 1.452 |
| Unclassified classII |                | 0.005        | 0.11  | 0.036 | 0.012 | 0.017 | 0.103 | 0.032 | 0.019 | 0.006 | 0.042 |
| SSR                  | Simple repeat  | 0.419        | 0.734 | 0.519 | 1.072 | 1.205 | 0.851 | 1.409 | 0.794 | 0.379 | 0.41  |
| SSR                  | Low complexity | 0.861        | 3.196 | 3.438 | 2.935 | 5.925 | 2.806 | 6.629 | 6.662 | 1.288 | 2.225 |
| SSR                  | Satellite      | 0.01         | 0.042 | 0.019 | 0.007 | 0.006 | 0.011 | 0.006 | 0.015 | 0.004 | 1.747 |
| SSR                  | Other          | 0.01         | 0.042 | 0.019 | 0.007 | 0.006 | 0.011 | 0.006 | 0.015 | 0.004 | 1.747 |
| SSR                  | Unclassified   | 8.325        | 8.394 | 3.933 | 5.884 | 5.795 | 7.73  | 4.838 | 5.338 | 7.355 | 4.376 |
| Unclassified         |                | 3.257        | 3.75  | 3.091 | 3.32  | 7.14  | 7.107 | 8.254 | 7.398 | 0.76  | 3.996 |

Supplementary Table 6: Enrichment of TE superfamilies in TE islands

| Element type  | Total bp in TE islands | Total bp in LDRs | Total number in TE islands | Total number in LDRs | FDR (base count) | FDR (element number) |
|---------------|------------------------|------------------|----------------------------|----------------------|------------------|----------------------|
| Unclassified  | 1892769                | 4847567          | 9616                       | 41643                | >4.53E-155       | >4.53E-155           |
| TcMar-Tc1     | 84041                  | 22152            | 515                        | 164                  | >4.53E-155       | >4.53E-155           |
| DIRS          | 125721                 | 30503            | 330                        | 201                  | >4.53E-155       | 4.53E-155            |
| RTE           | 138967                 | 64262            | 309                        | 502                  | >4.53E-155       | 5.68E-73             |
| Ngaro         | 22579                  | 5560             | 115                        | 31                   | >4.53E-155       | 1.99E-72             |
| TcMar-Mariner | 9797                   | 686              | 76                         | 9                    | >4.53E-155       | 2.05E-56             |
| Maverick      | 51886                  | 64613            | 353                        | 865                  | >4.53E-155       | 1.14E-49             |
| LOA           | 18863                  | 3596             | 67                         | 53                   | >4.53E-155       | 4.80E-28             |
| Kolobok-Hydra | 6187                   | 1190             | 20                         | 7                    | >4.53E-155       | 4.24E-12             |
| on            | 2804                   | 1230             | 19                         | 11                   | >4.53E-155       | 1.10E-09             |
| Loa           | 38653                  | 13148            | 42                         | 93                   | >4.53E-155       | 1.57E-07             |
| R1            | 121215                 | 152620           | 286                        | 1357                 | >4.53E-155       | 3.05E-07             |
| BEL           | 553183                 | 285447           | 560                        | 2984                 | >4.53E-155       | 5.48E-07             |
| Academ        | 5341                   | 13540            | 52                         | 167                  | 0.033            | 3.75E-05             |
| Merlin        | 6610                   | 8835             | 41                         | 120                  | >4.53E-155       | 5.32E-05             |
| R2            | 20282                  | 31169            | 37                         | 139                  | >4.53E-155       | 0.007                |

Supplementary Table 7: List of duplication/deletion candidate loci and intersection with Cobs1.4 annotated genes

| DUPLICATIONS |         |         |                                                                     |         |    |               |                           |                                                                  |      |         |
|--------------|---------|---------|---------------------------------------------------------------------|---------|----|---------------|---------------------------|------------------------------------------------------------------|------|---------|
| Scf          | Start   | Stop    | Name;covBR;covJP;log2ratio;JPhet;exon bases;TE bases; island_binary | Het SNV | In | Affected gene | Type                      | Gene alias                                                       | Isl. | RNA seq |
| scf0022      | 552001  | 553001  | candidate_002;191;109;0.807;2;781;99;0                              | 2       | BR | Cobs_06524    | Single exon duplication   | upf0468_protein_cg5343-like                                      | NO   | YES     |
| scf0022      | 552001  | 553001  | candidate_002;191;109;0.807;2;781;99;0                              | 2       | BR | Cobs_06530    | Single exon duplication   | transcription_initiation_factor_tffid_subunit_9-like             | NO   | YES     |
| scf0072      | 9001    | 10001   | candidate_004;121;64;0.922;0;1000;115;0                             | 0       | BR | Cobs_15626    | Partial exon duplication  | pin2-interacting_protein_x1                                      | NO   | YES     |
| scf0028      | 384001  | 385001  | candidate_007;65;130;-1.002546172;4;215;102;0                       | 4       | JP | Cobs_04037    | Whole gene duplication    |                                                                  | NO   | YES     |
| scf0030      | 1215001 | 1216001 | candidate_007;96;54;0.820;4;373;193;0                               | 4       | BR | Cobs_05921    | Multiple exon duplication | odorant_receptor_168                                             | NO   | YES     |
| scf0055      | 661001  | 662001  | candidate_014;81;268;-1.732135971;1;459;52;0                        | 1       | JP | Cobs_10648    | Multiple exon duplication | hypothetical_protein_G5I_05212                                   | NO   | YES     |
| scf0044      | 556001  | 557001  | candidate_016;441;160;1.467;8;1000;0;0                              | 8       | BR | Cobs_02801    | Partial exon duplication  | Mucin-1                                                          | NO   | YES     |
| scf0010      | 108001  | 109001  | candidate_037;368;128;1.522;9;273;214;0                             | 9       | BR | Cobs_00609    | Multiple exon duplication |                                                                  | NO   | NO      |
| scf0003      | 617001  | 618001  | candidate_045;175;94;0.900;0;128;0;1                                | 0       | BR | Cobs_14275    | Multiple exon duplication |                                                                  | YES  | NO      |
| scf0003      | 1714001 | 1715001 | candidate_046;139;78;0.839;6;903;0;0                                | 6       | BR | Cobs_14337    | Whole gene duplication    | 85_kda_calcium-independent_phospholipase_a2-like                 | NO   | YES     |
| scf0003      | 1715001 | 1716001 | candidate_047;228;98;1.210;10;1000;0;0                              | 10      | BR | Cobs_14337    | Whole gene duplication    | 85_kda_calcium-independent_phospholipase_a2-like                 | NO   | YES     |
| scf0003      | 1716001 | 1717001 | candidate_048;128;58;1.129;8;455;0;0                                | 8       | BR | Cobs_14337    | Whole gene duplication    | 85_kda_calcium-independent_phospholipase_a2-like                 | NO   | YES     |
| scf0002      | 1474001 | 1475001 | candidate_059;323;78;2.054;32;973;24;1                              | 32      | BR | Cobs_17748    | Whole gene duplication    |                                                                  | YES  | YES     |
| scf0002      | 2683001 | 2684001 | candidate_075;99;54;0.887;7;347;346;1                               | 7       | BR | Cobs_17834    | Multiple exon duplication | cytochrome_p450_4c1                                              | YES  | YES     |
| scf0035      | 1363001 | 1364001 | candidate_092;52;102;-0.95364953;14;406;343;0                       | 14      | JP | Cobs_04670    | Multiple exon duplication | coiled-coil_domain-containing_protein_95                         | NO   | YES     |
| scf0035      | 1364001 | 1365001 | candidate_093;66;132;-1.009649218;25;780;0;0                        | 25      | JP | Cobs_04689    | Multiple exon duplication | sin3_histone_deacetylase_corepressor_complex_component_sds3-like | NO   | YES     |
| scf0001      | 4465001 | 4466001 | candidate_094;80;20;2.000;5;313;243;1                               | 5       | BR | Cobs_07170    | Multiple exon duplication | hypothetical_protein_EAI_00174                                   | YES  | YES     |
| scf0001      | 4466001 | 4467001 | candidate_095;148;48;1.628;4;628;59;1                               | 4       | BR | Cobs_07170    | Multiple exon duplication | hypothetical_protein_EAI_00174                                   | YES  | YES     |
| scf0042      | 2001    | 3001    | candidate_098;119;217;-0.873101452;4;349;329;0                      | 4       | JP | Cobs_15501    | Multiple exon duplication | nucleoside_diphosphate_kinase_7                                  | NO   | YES     |
| scf0001      | 4823001 | 4824001 | candidate_101;371;176;1.075;10;647;7;1                              | 10      | BR | Cobs_07201    | Multiple exon duplication | hypothetical_protein_SINV_05299                                  | YES  | YES     |



|         |         |         |                                                |    |    |            |                           |                                                                             |     |     |
|---------|---------|---------|------------------------------------------------|----|----|------------|---------------------------|-----------------------------------------------------------------------------|-----|-----|
| scf0007 | 1468001 | 1469001 | candidate_115;216;107;1.021;0;126;0;1          | 0  | BR | Cobs_13418 | Multiple exon duplication | odorant_receptor_13a                                                        | YES | NO  |
| scf0007 | 1469001 | 1470001 | candidate_116;213;99;1.107;0;366;0;1           | 0  | BR | Cobs_13416 | Whole gene duplication    |                                                                             | YES | NO  |
| scf0037 | 73001   | 74001   | candidate_123;89;156;-0.812559297;10;129;0;0   | 10 | JP | Cobs_00477 | Whole gene duplication    |                                                                             | NO  | YES |
| scf0037 | 122001  | 123001  | candidate_127;61;157;-1.372576506;6;452;153;0  | 6  | JP | Cobs_00487 | Whole gene duplication    | nicotinic_acetylcholine_receptor_subunit_alpha_6_transcript_variant_partial | NO  | YES |
| scf0037 | 122001  | 123001  | candidate_127;61;157;-1.372576506;6;452;153;0  | 6  | JP | Cobs_00483 | Whole gene duplication    |                                                                             | NO  | NO  |
| scf0037 | 126001  | 127001  | candidate_128;59;150;-1.354662195;5;310;0;0    | 5  | JP | Cobs_00482 | Whole gene duplication    |                                                                             | NO  | YES |
| scf0037 | 952001  | 953001  | candidate_129;49;101;-1.056522402;8;185;126;0  | 8  | JP | Cobs_00543 | Whole gene duplication    |                                                                             | NO  | NO  |
| scf0037 | 953001  | 954001  | candidate_130;53;100;-0.900691163;5;366;90;0   | 5  | JP | Cobs_00543 | Whole gene duplication    |                                                                             | NO  | NO  |
| scf0018 | 2159001 | 2160001 | candidate_143;58;104;-0.846853003;15;743;0;0   | 15 | JP | Cobs_09630 | Multiple exon duplication | hypothetical_protein_EAG_01487                                              | NO  | YES |
| scf0025 | 148001  | 149001  | candidate_149;33;89;-1.441702554;20;274;165;0  | 20 | JP | Cobs_06204 | Whole gene duplication    | hypothetical_protein_SINV_03739                                             | NO  | NO  |
| scf0012 | 754001  | 755001  | candidate_178;67;128;-0.935076915;11;535;291;1 | 11 | JP | Cobs_15866 | Multiple exon duplication | fatty_acid_synthase                                                         | YES | NO  |
| scf0004 | 4177001 | 4178001 | candidate_215;44;78;-0.840153732;25;533;0;0    | 25 | JP | Cobs_05107 | Whole gene duplication    | isoform_a                                                                   | NO  | YES |
| scf0004 | 4177001 | 4178001 | candidate_215;44;78;-0.840153732;25;533;0;0    | 25 | JP | Cobs_05102 | Whole gene duplication    |                                                                             | NO  | NO  |
| scf0004 | 4178001 | 4179001 | candidate_216;58;107;-0.890949904;31;791;0;0   | 31 | JP | Cobs_05107 | Whole gene duplication    | isoform_a                                                                   | NO  | YES |
| scf0004 | 4178001 | 4179001 | candidate_216;58;107;-0.890949904;31;791;0;0   | 31 | JP | Cobs_05102 | Whole gene duplication    |                                                                             | NO  | NO  |
| scf0004 | 4179001 | 4180001 | candidate_217;46;128;-1.456836393;38;848;78;0  | 38 | JP | Cobs_05107 | Whole gene duplication    | isoform_a                                                                   | NO  | YES |
| scf0004 | 4179001 | 4180001 | candidate_217;46;128;-1.456836393;38;848;78;0  | 38 | JP | Cobs_05102 | Whole gene duplication    |                                                                             | NO  | NO  |
| scf0004 | 4180001 | 4181001 | candidate_218;90;173;-0.952840484;34;1000;0;0  | 34 | JP | Cobs_05107 | Whole gene duplication    | isoform_a                                                                   | NO  | YES |
| scf0004 | 4180001 | 4181001 | candidate_218;90;173;-0.952840484;34;1000;0;0  | 34 | JP | Cobs_05102 | Whole gene duplication    |                                                                             | NO  | NO  |
| scf0004 | 5302001 | 5303001 | candidate_219;39;74;-0.936086412;0;542;200;0   | 0  | JP | Cobs_05246 | Whole gene duplication    | iron-sulfur_cluster_co-chaperone_protein_mitochondrial-like                 | NO  | YES |
| scf0009 | 45001   | 46001   | candidate_224;59;112;-0.929677212;32;95;67;1   | 32 | JP | Cobs_16853 | Single exon duplication   | cellular_nucleic_acid-binding_protein                                       | YES | NO  |
| scf0009 | 289001  | 290001  | candidate_226;50;109;-1.114057336;12;395;50;1  | 12 | JP | Cobs_16890 | Whole gene duplication    | adenylate_cyclase_type_10                                                   | YES | NO  |
| scf0009 | 580001  | 581001  | candidate_229;70;182;-1.371314387;33;729;0;1   | 33 | JP | Cobs_16903 | Whole gene duplication    | hypothetical_protein_EAG_04423                                              | YES | NO  |
| scf0009 | 4113001 | 4114001 | candidate_238;22;50;-1.194886622;0;185;141;0   | 0  | JP | Cobs_17195 | Whole gene duplication    |                                                                             | NO  | YES |
| scf0009 | 5349001 | 5350001 | candidate_241;48;92;-0.942831796;10;529;251;1  | 10 | JP | Cobs_17316 | Whole gene duplication    |                                                                             | YES | NO  |
| scf0009 | 5638001 | 5639001 | candidate_243;53;112;-1.081607453;9;821;410;1  | 9  | JP | Cobs_17356 | Whole gene duplication    | PREDICTED:_uncharacterized_protein_K02A2.6-like                             | YES | NO  |
| scf0010 | 155001  | 156001  | candidate_252;43;115;-1.419704346;4;561;463;0  | 4  | JP | Cobs_00607 | Multiple exon duplication | hypothetical_protein_EAG_02592                                              | NO  | NO  |

|         |         |         |                                                |    |    |            |                           |                                              |     |     |
|---------|---------|---------|------------------------------------------------|----|----|------------|---------------------------|----------------------------------------------|-----|-----|
| scf0010 | 5129001 | 5130001 | candidate_259;29;64;-1.157054559;0;153;34;0    | 0  | JP | Cobs_01066 | Whole gene duplication    |                                              | NO  | NO  |
| scf0006 | 5610001 | 5611001 | candidate_267;38;75;-0.971717664;0;106;56;0    | 0  | JP | Cobs_09179 | Multiple exon duplication |                                              | NO  | NO  |
| scf0008 | 2911001 | 2912001 | candidate_276;46;102;-1.137478081;1;314;57;1   | 1  | JP | Cobs_16467 | Whole gene duplication    |                                              | YES | NO  |
| scf0008 | 3313001 | 3314001 | candidate_278;33;66;-1.002599274;0;458;0;0     | 0  | JP | Cobs_16545 | Whole gene duplication    | hypothetical_protein_SINV_06963              | NO  | YES |
| scf0008 | 3313001 | 3314001 | candidate_278;33;66;-1.002599274;0;458;0;0     | 0  | JP | Cobs_16554 | Whole gene duplication    |                                              | NO  | NO  |
| scf0003 | 85001   | 86001   | candidate_282;47;81;-0.802449243;12;618;0;1    | 12 | JP | Cobs_14245 | Partial exon duplication  | jerky_protein_homolog-like                   | YES | NO  |
| scf0003 | 480001  | 481001  | candidate_283;25;48;-0.923793684;0;207;151;1   | 0  | JP | Cobs_14265 | Multiple exon duplication | odorant_receptor_13a                         | YES | NO  |
| scf0003 | 712001  | 713001  | candidate_285;121;269;-1.155246806;8;502;42;1  | 8  | JP | Cobs_14284 | Multiple exon duplication | hypothetical_protein_G5I_09119               | YES | NO  |
| scf0003 | 943001  | 944001  | candidate_286;35;63;-0.838878536;0;323;168;0   | 0  | JP | Cobs_14297 | Multiple exon duplication | transcriptional_regulator_atrx               | NO  | YES |
| scf0003 | 3184001 | 3185001 | candidate_292;28;83;-1.546172902;9;365;116;1   | 9  | JP | Cobs_14441 | Whole gene duplication    | hypothetical_protein_SINV_08869              | YES | YES |
| scf0002 | 1440001 | 1441001 | candidate_301;50;153;-1.605684692;0;448;174;1  | 0  | JP | Cobs_17749 | Whole gene duplication    |                                              | YES | NO  |
| scf0002 | 1441001 | 1442001 | candidate_302;12;29;-1.293020781;0;212;113;1   | 0  | JP | Cobs_17749 | Whole gene duplication    |                                              | YES | NO  |
| scf0002 | 1723001 | 1724001 | candidate_305;46;89;-0.937334261;7;177;120;1   | 7  | JP | Cobs_17787 | Multiple exon duplication |                                              | YES | NO  |
| scf0002 | 2337001 | 2338001 | candidate_307;88;346;-1.980760634;18;433;245;1 | 18 | JP | Cobs_17885 | Whole gene duplication    | tyrosine_recombinase                         | YES | NO  |
| scf0002 | 2813001 | 2814001 | candidate_309;41;114;-1.470732135;11;632;163;1 | 11 | JP | Cobs_17872 | Whole gene duplication    | PREDICTED:_hypothetical_protein_LOC100573698 | YES | NO  |
| scf0002 | 2814001 | 2815001 | candidate_310;39;141;-1.849091768;12;527;99;1  | 12 | JP | Cobs_17872 | Whole gene duplication    | PREDICTED:_hypothetical_protein_LOC100573698 | YES | NO  |
| scf0002 | 3224001 | 3225001 | candidate_312;47;130;-1.477483194;4;871;0;1    | 4  | JP | Cobs_17892 | Whole gene duplication    | gustatory_receptor_28b                       | YES | NO  |
| scf0002 | 3432001 | 3433001 | candidate_313;56;113;-1.01704099;32;462;0;1    | 32 | JP | Cobs_17925 | Multiple exon duplication | hypothetical_protein_EAG_00455               | YES | NO  |
| scf0002 | 3432001 | 3433001 | candidate_313;56;113;-1.01704099;32;462;0;1    | 32 | JP | Cobs_17927 | Multiple exon duplication | hypothetical_protein_EAG_00088               | YES | NO  |
| scf0001 | 2003001 | 2004001 | candidate_322;67;132;-0.96762421;11;791;0;1    | 11 | JP | Cobs_07015 | Whole gene duplication    | serine_threonine-protein_kinase              | YES | NO  |
| scf0001 | 2003001 | 2004001 | candidate_322;67;132;-0.96762421;11;791;0;1    | 11 | JP | Cobs_07016 | Whole gene duplication    |                                              | YES | NO  |
| scf0007 | 1234001 | 1235001 | candidate_350;255;456;-0.839904468;9;279;0;1   | 9  | JP | Cobs_13394 | Whole gene duplication    |                                              | YES | NO  |
| scf0007 | 1463001 | 1464001 | candidate_352;34;60;-0.833221343;0;340;127;1   | 0  | JP | Cobs_13418 | Multiple exon duplication | odorant_receptor_13a                         | YES | NO  |
| scf0007 | 1999001 | 2000001 | candidate_353;118;396;-1.750453075;0;182;109;1 | 0  | JP | Cobs_13483 | Multiple exon duplication | uncharacterized_aminotransferase_sso0104     | YES | YES |
| scf0007 | 2000001 | 2001001 | candidate_354;161;599;-1.89448593;0;417;162;1  | 0  | JP | Cobs_13483 | Multiple exon duplication | uncharacterized_aminotransferase_sso0104     | YES | YES |
| scf0007 | 2000001 | 2001001 | candidate_354;161;599;-1.89448593;0;417;162;1  | 0  | JP | Cobs_13486 | Whole gene duplication    | nuclease_harbi1-like                         | YES | NO  |
| scf0007 | 4178001 | 4179001 | candidate_361;66;122;-0.899327359;6;709;183;0  | 6  | JP | Cobs_13711 | Whole gene duplication    | hypothetical_protein_SINV_02031              | NO  | YES |
| scf0007 | 5028001 | 5029001 | candidate_367;50;112;-1.161303072;32;351;0;1   | 32 | JP | Cobs_13806 | Whole gene duplication    |                                              | YES | NO  |
| scf0007 | 5029001 | 5030001 | candidate_368;67;154;-1.197783686;34;364;0;1   | 34 | JP | Cobs_13806 | Whole gene duplication    |                                              | YES | NO  |

| scf0007          | 5030001 | 5031001 | candidate_369;49;120;-1.286188148;65;386;356;1                     | 65       | JP | Cobs_13802    | Whole gene duplication    | pol-like_protein                            | YES | NO      |
|------------------|---------|---------|--------------------------------------------------------------------|----------|----|---------------|---------------------------|---------------------------------------------|-----|---------|
| scf0007          | 5092001 | 5093001 | candidate_371;43;91;-1.069968987;18;318;227;1                      | 18       | JP | Cobs_13817    | Whole gene duplication    | hypothetical_protein_EAG_06404              | YES | NO      |
| scf0007          | 5093001 | 5094001 | candidate_372;39;97;-1.312569542;16;479;335;1                      | 16       | JP | Cobs_13813    | Multiple exon duplication | hypothetical_protein_EAG_00248              | YES | NO      |
| scf0007          | 5093001 | 5094001 | candidate_372;39;97;-1.312569542;16;479;335;1                      | 16       | JP | Cobs_13817    | Whole gene duplication    | hypothetical_protein_EAG_06404              | YES | NO      |
| scf0007          | 5094001 | 5095001 | candidate_373;47;110;-1.212024683;19;997;72;1                      | 19       | JP | Cobs_13813    | Multiple exon duplication | hypothetical_protein_EAG_00248              | YES | NO      |
| <b>DELETIONS</b> |         |         |                                                                    |          |    |               |                           |                                             |     |         |
| Scf              | Start   | Stop    | Name;covBR;covJP;log2ratio;JPhet;exon bases;TE bases;island_binary | Gap (kb) | In | Affected gene | Type                      | Gene alias                                  | Isl | RNA seq |
| scf0093          | 9001    | 10001   | candidate_003;111;58;0.935;0;1000;0;0                              | 0.3      | JP | Cobs_14758    | Partial exon deletion     | g-protein_coupled_receptor_mth2             | NO  | YES     |
| scf0009          | 261001  | 262001  | candidate_032;59;1;6.659;0;367;0;1                                 | 1.8      | JP | Cobs_16872    | Gene deletion             |                                             | YES | NO      |
| scf0009          | 466001  | 467001  | candidate_034;77;1;5.689;1;382;195;1                               | 4.6      | JP | Cobs_16892    | Gene deletion             |                                             | YES | NO      |
| scf0010          | 88001   | 89001   | candidate_036;124;8;4.020;5;218;104;0                              | 2.4      | JP | Cobs_00602    | Single exon deletion      |                                             | NO  | NO      |
| scf0010          | 5244001 | 5245001 | candidate_038;65;0;Inf;0;440;53;0                                  | 1.6      | JP | Cobs_01070    | Gene deletion             | major_royal_jelly_protein_1                 | NO  | YES     |
| scf0010          | 5245001 | 5246001 | candidate_039;47;0;9.410;0;426;256;0                               | 1.3      | JP | Cobs_01070    | Gene deletion             | major_royal_jelly_protein_1                 | NO  | YES     |
| scf0008          | 3060001 | 3061001 | candidate_042;44;6;2.880;0;257;247;1                               | 2.7      | JP | Cobs_16510    | Multiple exon deletion    | fatty_acid_synthase                         | YES | NO      |
| scf0003          | 307001  | 308001  | candidate_044;37;0;10.053;0;324;124;1                              | 1.3      | JP | Cobs_14262    | Multiple exon deletion    |                                             | YES | NO      |
| scf0003          | 3279001 | 3280001 | candidate_052;67;22;1.593;2;215;46;1                               | 3.1      | JP | Cobs_14454    | Gene deletion             | hypothetical_protein_SINV_05682             | YES | NO      |
| scf0003          | 3288001 | 3289001 | candidate_053;52;6;3.106;0;732;708;1                               | 3.2      | JP | Cobs_14460    | Gene deletion             | integrase_core_domain_protein               | YES | YES     |
| scf0003          | 3293001 | 3294001 | candidate_054;17;0;5.489;0;346;218;1                               | 4.9      | JP | Cobs_14465    | Gene deletion             | bel12_ag_transposon_polyprotein             | YES | NO      |
| scf0002          | 1622001 | 1623001 | candidate_061;59;4;4.011;0;74;70;1                                 | 5.9      | JP | Cobs_17755    | Gene deletion             | vitellogenin_receptor                       | YES | NO      |
| scf0002          | 1623001 | 1624001 | candidate_062;71;6;3.507;1;274;0;1                                 | 3.7      | JP | Cobs_17755    | Gene deletion             | vitellogenin_receptor                       | YES | NO      |
| scf0002          | 1705001 | 1706001 | candidate_063;44;0;7.241;0;287;124;1                               | 4.3      | JP | Cobs_17789    | Gene deletion             | period_circadian_protein                    | YES | YES     |
| scf0002          | 2572001 | 2573001 | candidate_073;48;14;1.840;0;771;225;1                              | 2.4      | JP | Cobs_17838    | Gene deletion             | zinc_finger_mym-type_protein_1-like         | YES | NO      |
| scf0001          | 1377001 | 1378001 | candidate_078;77;0;7.584;0;951;0;1                                 | 2.0      | JP | Cobs_06974    | Gene deletion             | zinc_knuckle_domain_protein                 | YES | NO      |
| scf0001          | 1409001 | 1410001 | candidate_083;52;6;3.001;0;180;51;1                                | 0.7      | JP | Cobs_06972    | Single exon deletion      |                                             | YES | NO      |
| scf0001          | 1445001 | 1446001 | candidate_085;91;4;4.640;5;120;43;1                                | 3.5      | JP | Cobs_06975    | Multiple exon deletion    | er_degradation-enhancing_alpha-mannosidase- | YES | YES     |

|         |         |         |                                                |     |    |            |                        | like_3-like                           |     |     |
|---------|---------|---------|------------------------------------------------|-----|----|------------|------------------------|---------------------------------------|-----|-----|
| scf0001 | 1861001 | 1862001 | candidate_092;56;20;1.470;6;411;254;1          | 1.8 | JP | Cobs_07000 | Gene deletion          |                                       | YES | NO  |
| scf0001 | 4968001 | 4969001 | candidate_106;70;0;12.194;0;521;103;1          | 3.6 | JP | Cobs_07210 | Single exon deletion   | hypothetical_protein_SINV_09002       | YES | NO  |
| scf0007 | 1299001 | 1300001 | candidate_112;31;4;3.044;0;467;100;1           | 2.5 | JP | Cobs_13411 | Partial exon deletion  | hypothetical_protein_EAG_01487        | YES | YES |
| scf0007 | 1423001 | 1424001 | candidate_114;203;5;5.451;3;474;86;1           | 1.5 | JP | Cobs_13414 | Gene deletion          | hypothetical_protein_SINV_00831       | YES | NO  |
| scf0007 | 2576001 | 2577001 | candidate_125;95;0;12.213;0;780;123;1          | 2.6 | JP | Cobs_13524 | Gene deletion          | tyrosine_partial                      | YES | NO  |
| scf0007 | 2576001 | 2577001 | candidate_125;95;0;12.213;0;780;123;1          | 2.3 | JP | Cobs_13525 | Single exon deletion   | hypothetical_protein_EAI_02370        | YES | NO  |
| scf0007 | 2905001 | 2906001 | candidate_129;66;16;2.039;0;273;45;1           | 2.3 | JP | Cobs_13563 | Single exon deletion   | hypothetical_protein_EAG_07634        | YES | NO  |
| scf0007 | 5225001 | 5226001 | candidate_130;42;0;11.347;0;616;0;1            | 0.6 | JP | Cobs_13822 | Multiple exon deletion | hypothetical_protein_GIP_L7_0050      | YES | NO  |
| scf0007 | 5226001 | 5227001 | candidate_131;86;38;1.197;3;242;173;1          | 3.7 | JP | Cobs_13822 | Multiple exon deletion | hypothetical_protein_GIP_L7_0050      | YES | NO  |
| scf0003 | 2774001 | 2775001 | candidate_288;243;484;-0.995002301;9;325;136;1 | 5.1 | JP | Cobs_14410 | Multiple exon deletion | reverse_transcriptase_and_recombinase | YES | YES |

Supplementary Table 8: List of *de novo* assembled contigs containing an ORF

| Contig ID   | Length | Best blastx hit | Length of hit | Description                                                                          | E value  | Bit score | Frame | Query start | Query end | Hit start | Hit end | Positives | Identical |
|-------------|--------|-----------------|---------------|--------------------------------------------------------------------------------------|----------|-----------|-------|-------------|-----------|-----------|---------|-----------|-----------|
| NODE_388976 | 14592  | XP_003689693    | 1765          | PREDICTED: LOW QUALITY PROTEIN: vitellogenin-like [Apis florea]                      | 0        | 410       | 2     | 3416        | 5455      | 251       | 897     | 54.60%    | 35.10%    |
| NODE_372516 | 1358   | EGI70062        | 895           | Transmembrane protein C9orf5 [Acromyrmex echinator]                                  | 1.00E-83 | 283       | 1     | 527         | 1165      | 1         | 212     | 76.40%    | 65.70%    |
| NODE_478441 | 1239   | EGI65030        | 898           | Sorting nexin-25 [Acromyrmex echinator]                                              | 1.00E-76 | 204       | 2     | 314         | 634       | 31        | 137     | 96.30%    | 92.50%    |
| NODE_426727 | 2425   | EFZ16328        | 620           | hypothetical protein SINV_06913 [Solenopsis invicta]                                 | 9.00E-70 | 190       | 2     | 540         | 1451      | 352       | 602     | 52.80%    | 44.00%    |
| NODE_417388 | 855    | EFZ16328        | 620           | hypothetical protein SINV_06913 [Solenopsis invicta]                                 | 3.00E-56 | 152       | 0     | 424         | 747       | 123       | 231     | 85.30%    | 74.30%    |
| NODE_396624 | 7803   | EFN68490        | 1573          | Peripheral-type benzodiazepine receptor-associated protein 1 [Camponotus floridanus] | 3.00E-30 | 141       | 2     | 209         | 538       | 48        | 157     | 74.50%    | 70.00%    |
| NODE_451872 | 579    | EGI66069        | 1045          | Protein toll [Acromyrmex echinator]                                                  | 9.00E-28 | 117       | 0     | 286         | 516       | 966       | 1045    | 78.80%    | 75.00%    |
| NODE_241469 | 369    | AEV76939        | 320           | NADH dehydrogenase subunit 1 [Camponotus vafer]                                      | 9.00E-24 | 100       | 0     | 1           | 369       | 37        | 159     | 57.70%    | 43.90%    |
| NODE_401423 | 643    | XP_003706903    | 1705          | PREDICTED: uncharacterized protein LOC100874905 [Megachile rotundata]                | 4.00E-20 | 96.7      | 2     | 381         | 536       | 34        | 85      | 98.10%    | 88.50%    |
| NODE_443138 | 611    | EGI57979        | 162           | hypothetical protein G5I_13957 [Acromyrmex echinator]                                | 2.00E-15 | 78.2      | 0     | 135         | 389       | 55        | 142     | 67.80%    | 60.00%    |
| NODE_352113 | 136    | EFN84361        | 94            | hypothetical protein EAI_03729 [Harpegnathos saltator]                               | 5.00E-15 | 69.7      | 1     | 1           | 132       | 38        | 81      | 84.10%    | 68.20%    |
| NODE_440382 | 6431   | EFZ16363        | 78            | hypothetical protein SINV_09927 [Solenopsis invicta]                                 | 8.00E-15 | 79.7      | 2     | 5119        | 5346      | 1         | 78      | 59.00%    | 57.70%    |
| NODE_467846 | 151    | EFZ11980        | 128           | hypothetical protein SINV_01763 [Solenopsis invicta]                                 | 4.00E-12 | 63.5      | 1     | 1           | 147       | 23        | 71      | 73.50%    | 55.10%    |
| NODE_593100 | 151    | EFZ11980        | 128           | hypothetical protein SINV_01763 [Solenopsis invicta]                                 | 5.00E-12 | 63.2      | 1     | 5           | 151       | 23        | 71      | 73.50%    | 55.10%    |
| NODE_459514 | 226    | EGI65596        | 271           | hypothetical protein G5I_05988 [Acromyrmex echinator]                                | 8.00E-11 | 63.5      | 0     | 1           | 126       | 230       | 271     | 83.30%    | 66.70%    |
| NODE_96922  | 191    | EFN83463        | 257           | hypothetical protein EAI_08541 [Harpegnathos saltator]                               | 2.00E-10 | 62        | 0     | 19          | 189       | 136       | 192     | 66.70%    | 52.60%    |
| NODE_144210 | 300    | EFZ09717        | 207           | hypothetical protein SINV_15650 [Solenopsis invicta]                                 | 7.00E-10 | 61.2      | 1     | 6           | 263       | 9         | 97      | 57.80%    | 38.90%    |

Supplementary Table 9: List of GO terms underrepresented in TE islands

| GO-ID      | Term                                                           | Category | FDR         | #Test | #Ref |
|------------|----------------------------------------------------------------|----------|-------------|-------|------|
| GO:0005515 | protein binding                                                | F        | 1.74E-19    | 48    | 2533 |
| GO:0016021 | integral to membrane                                           | C        | 4.65E-07    | 23    | 1159 |
| GO:0003700 | sequence-specific DNA binding transcription factor activity    | F        | 9.48E-07    | 0     | 357  |
| GO:0005667 | transcription factor complex                                   | C        | 2.38E-05    | 1     | 348  |
| GO:0043565 | sequence-specific DNA binding                                  | F        | 4.50E-05    | 0     | 284  |
| GO:0044430 | cytoskeletal part                                              | C        | 1.03E-04    | 1     | 317  |
| GO:0007010 | cytoskeleton organization                                      | P        | 1.86E-04    | 0     | 250  |
| GO:0006928 | cellular component movement                                    | P        | 2.89E-04    | 1     | 291  |
| GO:0005524 | ATP binding                                                    | F        | 3.47E-04    | 17    | 807  |
| GO:1901566 | organonitrogen compound biosynthetic process                   | P        | 0.001158612 | 1     | 260  |
| GO:0071822 | protein complex subunit organization                           | P        | 0.001619753 | 0     | 207  |
| GO:0065008 | regulation of biological quality                               | P        | 0.001856809 | 5     | 397  |
| GO:0030234 | enzyme regulator activity                                      | F        | 0.002235494 | 1     | 245  |
| GO:0050790 | regulation of catalytic activity                               | P        | 0.002261041 | 1     | 248  |
| GO:0015630 | microtubule cytoskeleton                                       | C        | 0.002286604 | 1     | 249  |
| GO:0009966 | regulation of signal transduction                              | P        | 0.004465379 | 3     | 307  |
| GO:0009888 | tissue development                                             | P        | 0.004526085 | 3     | 310  |
| GO:1901137 | carbohydrate derivative biosynthetic process                   | P        | 0.004539984 | 0     | 182  |
| GO:0007264 | small GTPase mediated signal transduction                      | P        | 0.004660173 | 0     | 185  |
| GO:0015031 | protein transport                                              | P        | 0.004823331 | 2     | 274  |
| GO:0007267 | cell-cell signaling                                            | P        | 0.006042638 | 3     | 299  |
| GO:0040007 | growth                                                         | P        | 0.00628819  | 0     | 173  |
| GO:0048667 | cell morphogenesis involved in neuron differentiation          | P        | 0.00628819  | 0     | 174  |
| GO:0007017 | microtubule-based process                                      | P        | 0.00628819  | 1     | 227  |
| GO:0048812 | neuron projection morphogenesis                                | P        | 0.006382808 | 0     | 176  |
| GO:0009887 | organ morphogenesis                                            | P        | 0.008118047 | 3     | 293  |
| GO:0090407 | organophosphate biosynthetic process                           | P        | 0.008811062 | 0     | 164  |
| GO:0006468 | protein phosphorylation                                        | P        | 0.009516719 | 4     | 323  |
| GO:0046907 | intracellular transport                                        | P        | 0.011008803 | 3     | 285  |
| GO:0051128 | regulation of cellular component organization                  | P        | 0.011653655 | 1     | 208  |
| GO:0007276 | gamete generation                                              | P        | 0.012249983 | 1     | 212  |
| GO:0015077 | monovalent inorganic cation transmembrane transporter activity | F        | 0.012737248 | 0     | 160  |
| GO:0004672 | protein kinase activity                                        | F        | 0.012778601 | 4     | 315  |
| GO:0065003 | macromolecular complex assembly                                | P        | 0.013013762 | 0     | 162  |
| GO:0044723 | single-organism carbohydrate metabolic process                 | P        | 0.013013762 | 0     | 162  |
| GO:0048523 | negative regulation of cellular process                        | P        | 0.015124635 | 6     | 372  |
| GO:0005694 | chromosome                                                     | C        | 0.01594876  | 1     | 200  |
| GO:0009790 | embryo development                                             | P        | 0.01594876  | 2     | 236  |
| GO:0034613 | cellular protein localization                                  | P        | 0.01594876  | 2     | 238  |
| GO:0022402 | cell cycle process                                             | P        | 0.01594876  | 2     | 238  |
| GO:0031090 | organelle membrane                                             | C        | 0.015981543 | 2     | 239  |
| GO:0006184 | GTP catabolic process                                          | P        | 0.016245078 | 2     | 241  |

|            |                                                             |   |             |   |     |
|------------|-------------------------------------------------------------|---|-------------|---|-----|
| GO:0006091 | generation of precursor metabolites and energy              | P | 0.017699389 | 0 | 152 |
| GO:0061061 | muscle structure development                                | P | 0.017852228 | 0 | 153 |
| GO:0012505 | endomembrane system                                         | C | 0.018462732 | 0 | 155 |
| GO:0044459 | plasma membrane part                                        | C | 0.02196491  | 1 | 190 |
| GO:0007444 | imaginal disc development                                   | P | 0.022309481 | 2 | 233 |
| GO:0008289 | lipid binding                                               | F | 0.022309481 | 1 | 194 |
| GO:0042623 | ATPase activity, coupled                                    | F | 0.022565122 | 1 | 195 |
| GO:0048522 | positive regulation of cellular process                     | P | 0.023079374 | 4 | 302 |
| GO:0015672 | monovalent inorganic cation transport                       | P | 0.02523218  | 0 | 145 |
| GO:0009791 | post-embryonic development                                  | P | 0.030802838 | 2 | 226 |
| GO:0006357 | regulation of transcription from RNA polymerase II promoter | P | 0.031210105 | 1 | 187 |
| GO:0048610 | cellular process involved in reproduction                   | P | 0.031210105 | 1 | 187 |
| GO:0042330 | taxis                                                       | P | 0.035500923 | 0 | 134 |
| GO:0009069 | serine family amino acid metabolic process                  | P | 0.035923367 | 3 | 252 |
| GO:0019226 | transmission of nerve impulse                               | P | 0.041678654 | 2 | 216 |
| GO:2000026 | regulation of multicellular organismal development          | P | 0.042831962 | 1 | 174 |
| GO:0048646 | anatomical structure formation involved in morphogenesis    | P | 0.043495522 | 1 | 178 |
| GO:0031981 | nuclear lumen                                               | C | 0.044951027 | 6 | 340 |

Supplementary Table 10: List of GO terms overrepresented in TE islands

| GO-ID             | Term                                                                                               | Category | FDR                | #Test     | #Ref       |
|-------------------|----------------------------------------------------------------------------------------------------|----------|--------------------|-----------|------------|
| GO:0003964        | RNA-directed DNA polymerase activity                                                               | F        | 7.63E-52           | 53        | 16         |
| GO:0006278        | RNA-dependent DNA replication                                                                      | P        | 7.63E-52           | 53        | 16         |
| GO:0015074        | DNA integration                                                                                    | P        | 6.74E-50           | 48        | 10         |
| GO:0004190        | aspartic-type endopeptidase activity                                                               | F        | 6.46E-15           | 18        | 9          |
| <b>GO:0004984</b> | <b>olfactory receptor activity</b>                                                                 | <b>F</b> | <b>3.23E-14</b>    | <b>37</b> | <b>106</b> |
| <b>GO:0005549</b> | <b>odorant binding</b>                                                                             | <b>F</b> | <b>5.00E-13</b>    | <b>37</b> | <b>119</b> |
| GO:0003723        | RNA binding                                                                                        | F        | 9.01E-12           | 64        | 386        |
| <b>GO:0050911</b> | <b>detection of chemical stimulus involved in sensory perception of smell</b>                      | <b>P</b> | <b>6.36E-11</b>    | <b>24</b> | <b>53</b>  |
| <b>GO:0007187</b> | <b>G-protein coupled receptor signaling pathway, coupled to cyclic nucleotide second messenger</b> | <b>P</b> | <b>2.62E-06</b>    | <b>24</b> | <b>105</b> |
| GO:0006313        | transposition, DNA-mediated                                                                        | P        | 1.85E-05           | 7         | 4          |
| GO:0004803        | transposase activity                                                                               | F        | 1.85E-05           | 7         | 4          |
| GO:0004523        | ribonuclease H activity                                                                            | F        | 5.06E-05           | 8         | 9          |
| GO:0019012        | virion                                                                                             | C        | 7.83E-05           | 7         | 6          |
| GO:0003968        | RNA-directed RNA polymerase activity                                                               | F        | 3.78E-04           | 5         | 2          |
| GO:0004482        | mRNA (guanine-N7-)-methyltransferase activity                                                      | F        | 8.49E-04           | 5         | 3          |
| <b>GO:0005835</b> | <b>fatty acid synthase complex</b>                                                                 | <b>C</b> | <b>0.007123262</b> | <b>5</b>  | <b>7</b>   |
| GO:0006370        | 7-methylguanosine mRNA capping                                                                     | P        | 0.010608553        | 5         | 8          |
| <b>GO:0016297</b> | <b>acyl-[acyl-carrier-protein] hydrolase activity</b>                                              | <b>F</b> | <b>0.030929857</b> | <b>4</b>  | <b>6</b>   |

Supplementary Table 11: GLM of high aggression against intruding workers (intercept = BR x BR)

|                  | Estimate | Std. Error | t value | Pr(> t ) |     |
|------------------|----------|------------|---------|----------|-----|
| (Intercept)      | 0.24324  | 0.04470    | 5.442   | 8.91e-08 | *** |
| BR x JP          | 0.05526  | 0.06485    | 0.852   | 0.394568 |     |
| BR x <i>Waur</i> | 0.37995  | 0.06435    | 5.904   | 7.22e-09 | *** |
| JP x BR          | -0.24324 | 0.06301    | -3.861  | 0.000131 | *** |
| JP x JP          | -0.22991 | 0.06301    | -3.649  | 0.000296 | *** |
| JP x <i>Waur</i> | 0.28378  | 0.06322    | 4.489   | 9.21e-06 | *** |

Null deviance: 87.265 on 433 degrees of freedom  
Residual deviance: 63.287 on 428 degrees of freedom  
AIC: 410.03

Supplementary Table 12: GLM of high aggression against intruding queens (intercept = BR x BR)

|             | Estimate  | Std. Error | t value | Pr(> t ) |     |
|-------------|-----------|------------|---------|----------|-----|
| (Intercept) | 0.546875  | 0.054254   | 10.080  | < 2e-16  | *** |
| BR x JP     | -0.005891 | 0.077664   | -0.076  | 0.94     |     |
| JP x BR     | -0.412547 | 0.075863   | -5.438  | 1.23e-07 | *** |
| JP x JP     | -0.373542 | 0.073860   | -5.057  | 7.98e-07 | *** |

Null deviance: 59.663 on 266 degrees of freedom  
Residual deviance: 49.545 on 263 degrees of freedom  
AIC: 317.99

Supplementary Table 13: Quantitative assembly statistics for the raw draft genome assembly

|                           |             |
|---------------------------|-------------|
| Scaffolded sequence (bp)  | 182 048 038 |
| N50 scaffold size (bp)    | 2 570 857   |
| Total number of scaffolds | 11 084      |
| N50 contig size (bp)      | 14 935      |



**Supplementary Table 14: Draft genome sequences from other organisms used for gene annotation or comparative studies**

| Species                      | URL                                                                                                                                                                                                                                                                              |
|------------------------------|----------------------------------------------------------------------------------------------------------------------------------------------------------------------------------------------------------------------------------------------------------------------------------|
| <i>Atta cephalotes</i>       | <a href="http://antgenomes.org/downloads/acep_scaffolds.fasta.zip">http://antgenomes.org/downloads/acep_scaffolds.fasta.zip</a><br><a href="http://antgenomes.org/downloads/acep_genome.OGS.1.2.gff.zip">http://antgenomes.org/downloads/acep_genome.OGS.1.2.gff.zip</a>         |
| <i>Acromyrmex echinaior</i>  | <a href="http://antgenomes.org/downloads/aech/Aech_v2.0.fa.gz">http://antgenomes.org/downloads/aech/Aech_v2.0.fa.gz</a><br><a href="http://antgenomes.org/downloads/aech/Aech_v3.8.gff.gz">http://antgenomes.org/downloads/aech/Aech_v3.8.gff.gz</a>                             |
| <i>Camponotus floridans</i>  | <a href="http://antgenomes.org/downloads/cflo_v3.3.fa.zip">http://antgenomes.org/downloads/cflo_v3.3.fa.zip</a><br><a href="http://antgenomes.org/downloads/cflo_v3.3.gff.zip">http://antgenomes.org/downloads/cflo_v3.3.gff.zip</a>                                             |
| <i>Harpegnathus saltator</i> | <a href="http://antgenomes.org/downloads/hsal_v3.3.fa.zip">http://antgenomes.org/downloads/hsal_v3.3.fa.zip</a><br><a href="http://antgenomes.org/downloads/hsal_v3.3.gff.zip">http://antgenomes.org/downloads/hsal_v3.3.gff.zip</a>                                             |
| <i>Linepithema humile</i>    | <a href="http://antgenomes.org/downloads/arg_ant_scf4.fasta.zip">http://antgenomes.org/downloads/arg_ant_scf4.fasta.zip</a><br><a href="http://antgenomes.org/downloads/lhum_genome.OGS.1.2.gff.zip">http://antgenomes.org/downloads/lhum_genome.OGS.1.2.gff.zip</a>             |
| <i>Solenopsis invicta</i>    | <a href="http://antgenomes.org/downloads/Si_gnF.454scaffolds.fasta.zip">http://antgenomes.org/downloads/Si_gnF.454scaffolds.fasta.zip</a><br><a href="http://antgenomes.org/downloads/SI2.2.3.corrected.gff.zip">http://antgenomes.org/downloads/SI2.2.3.corrected.gff.zip</a>   |
| <i>Pogonomyrmex barbatus</i> | <a href="http://antgenomes.org/downloads/pbar_scaffolds_v03.fasta.zip">http://antgenomes.org/downloads/pbar_scaffolds_v03.fasta.zip</a><br><a href="http://antgenomes.org/downloads/pbar_genome.OGS.1.2.gff.zip">http://antgenomes.org/downloads/pbar_genome.OGS.1.2.gff.zip</a> |
| <i>Apis mellifera</i>        | <a href="http://antgenomes.org/downloads/Amel_4.5.AGP.linearScaffold.fa.zip">http://antgenomes.org/downloads/Amel_4.5.AGP.linearScaffold.fa.zip</a>                                                                                                                              |
| <i>Nasonia vitripennis</i>   | <a href="http://antgenomes.org/downloads/Nvit_2.0.linear.fa.zip">http://antgenomes.org/downloads/Nvit_2.0.linear.fa.zip</a>                                                                                                                                                      |

**Supplementary Table 15: Differences in gene evolution across hymenopteran genomes, based on copy number differences within orthologous groups**

|                                | Present in all / missing in one [530] | Single-copy in all / duplicated in one [995] |
|--------------------------------|---------------------------------------|----------------------------------------------|
| <i>Cardiocondyla obscurior</i> | 78                                    | 251                                          |
| <i>Nasonia vitripennis</i>     | 98                                    | 150                                          |
| <i>Apis mellifera</i>          | 56                                    | 110                                          |
| <i>Harpegnathus saltator</i>   | 50                                    | 76                                           |
| <i>Linepithema humile</i>      | 18                                    | 67                                           |
| <i>Camponotus floridans</i>    | 32                                    | 67                                           |
| <i>Pogonomyrmex barbatus</i>   | 14                                    | 65                                           |
| <i>Solenopsis invicta</i>      | 155                                   | 92                                           |
| <i>Acromyrmex echinaior</i>    | 22                                    | 30                                           |
| <i>Atta cephalotes</i>         | 7                                     | 87                                           |

Total number of single-copy deletion or duplication event is given in parentheses

**Supplementary Table 16: Reads generated per sample in the RNAseq experiment**

| <b>Sample</b> | <b>Type</b> | <b>Raw read Count</b> | <b>Reads mapped to genes</b> |
|---------------|-------------|-----------------------|------------------------------|
| QUI01         | Imago       | 18 234 979            | 3 023 851                    |
| QUI05         | Imago       | 24 958 424            | 2 635 246                    |
| QUI14         | Imago       | 22 518 877            | 4 415 260                    |
| QUI16         | Imago       | 17 864 237            | 3 803 684                    |
| QUI17         | Imago       | 17 246 589            | 2 674 107                    |
| QUI51         | Imago       | 23 405 068            | 3 810 613                    |
| QUI54         | Imago       | 18 675 375            | 2 966 886                    |
| QUL65         | Larva       | 20 406 972            | 4 572 339                    |
| QUL66         | Larva       | 27 288 687            | 7 386 863                    |
| QUL68         | Larva       | 29 225 761            | 3 192 075                    |
| QUL69         | Larva       | 23 043 865            | 5 214 123                    |
| QUL73         | Larva       | 23 071 947            | 5 296 047                    |
| QUL72         | Larva       | 22 855 327            | 9 096 679                    |
| QUL71         | Larva       | 26 443 413            | 5 567 634                    |

## Supplementary Methods

### Organisms

Live colonies of *Cardiocondyla obscurior* were collected from aborted fruits on coconut trees (*Cocos nucifera*) in Brazil (collected in 2009) and from bark cavities in coral trees (*Erythrina* sp.) in Japan (collected in 2010). The colonies were transferred to Regensburg and placed in plastered petri-dishes. Food (honey-soaked shreds of paper; *Drosophila* or small chunks of *Periplaneta americana*) and water were provided every three days and colonies were kept in incubators under constant conditions (12h 28° C light/12h 24° C dark). We emphasize that this is one species because recombinant inbred lines have produced viable offspring for over three years (3-4 generation / year) in our lab. Sampled individuals for subsequent DNA/RNA extractions were transferred to eppendorf tubes, snap-frozen in liquid nitrogen and stored at -80° C.

### Colony size

To assess differences in colony structure we used a more recent data set with detailed collection data. Colonies collected and censused immediately in November 2013 (BR) and April 2011 (JP) contained similar numbers of workers (Mann Whitney U = 778.5, Z = -0.634, p = 0.526; BR: median = 28, quartiles 21.75 and 51.25, n = 27 colonies; JP: median = 29, quartiles 16 and 47, n = 64). In contrast queen number was higher in Japan (Mann Whitney U = 501, Z = -3.084, p < 0.003; BR: 5 queens, quartiles 3, 8, n = 27 JP: 10 queens, quartiles 4, 19, n = 64).

### Morphometry

We compared body size of workers, queens and males of each population drawn randomly from different source colonies, using four continuous morphological characters (head width (HW), head length (HL), thorax width (TW), and thorax length (TL)), measured under a Keyence VH Z00R. In workers HL and HW were correlated (Pearson's r = 0.233, p = 0.028, n = 97) as well as TL and TW (r = 0.257, p = 0.012, n = 96). Workers from the BR lineage had smaller HW (Mann Whitney U = 394, Z = -5.647, p < 0.001) and smaller TW (U = 36, Z = -8179, p < 0.001). In queens all four characters were tightly correlated with each other (minimum Pearson correlation HL - TW, r = 0.492, p < 0.001, n = 59). Queens from BR and JP did not differ in head size (HW: U = 378, Z = -0.864, p = 0.387; HL: U = 312, Z = -1,865, p = 0.062) but BR queens had smaller thoraces (TL: U = 171, Z = -4.003, p < 0.001; TW: U = 168, Z = -4.048, p < 0.001). In wingless males the characters were also strongly correlated (minimum Pearson correlation HL - TW, r = 0.571, p = 0.002, n = 27) but did not differ between BR and JP (HL: U = 84, Z = -0.340, p = 0.756; TW: U = 75, Z = -0.776, p = 0.458).

### **Behavioral assays**

We tested the behavior of experimental colonies towards individual workers or queens from either the same or the other lineage. Experimental colonies consisted of 20 workers, one mated queen, and brood. Colonies were housed in small petri dishes with plaster flooring and a 5-cent sized deep indentation covered by a dark red cover slide. These colonies were allowed to adjust to their new nest for one week prior to the trials. Trials were performed under dimmed ambient red light (six lux). For each trial we removed the cover slide carefully and waited for five minutes to minimize effects by the disturbance before placing one alien individual into the vicinity of the nest. In addition to workers and mated queens of *C. obscurior*, we also performed trials with individual workers of *Wasmannia auropunctata* (*Waur*), to assess aggression against another ant species. After the introduction, we noted the behavior for a period of 5 minutes or until the intruder was killed. We scored the behavior with 1: Light antennation, 2: Antennation, display of mandible threat, 3: Antennation and short biting/pinches, 4: Antennation, short immobilization and biting, 5: Severe biting, occasional stinging and death of the intruder. Trials for which no interaction between intruder and resident occurred within 5 minutes were discarded. We performed a GLM comparing high aggressive interactions (score 5) versus all other categories combined, separately for workers and queens (Supplementary Table 10-11).

### **Chemical analysis**

We analyzed 8 BR and 8 JP colonies for differences in cuticular lipid profiles. Ants were extracted for 10 min in batches of 6 individuals in 40  $\mu$ l Hexane containing 30 ng methyl decanoate as internal standard. Extracts were analyzed on a GC2010 gas-chromatograph (GC) connected to a QP2010 plus mass-spectrometer (MS; both Shimadzu, Duisburg, Germany). The GC was equipped with a non-polar capillary column (BPX-5, 30 m length, 0.25 mm inner diameter, 0.25  $\mu$ m film thickness; SGE Analytical Science, Milton Keynes, UK). Helium was used as carrier gas with a constant linear velocity of 50 cm s<sup>-1</sup>. The temperature program of the GC-oven started at 80 °C and was raised by 5° C min<sup>-1</sup> to 300° C. The MS was run in electron impact (EI) mode at 70 eV and set to a scan range from 35 to 600 m/z<sup>-1</sup>. All samples were injected splitless at an injector temperature of 300° C. n-Alkanes were identified by comparing retention times and mass spectra with those of synthetic reference compounds. Methyl-branched CHCs were identified by interpretation of diagnostic ions and comparison of linear retention indices with literature data <sup>1</sup>.

For further analysis we used only those peaks that had a minimal area of 1 % in at least 75 % of the samples of at least one lineage. 22 Aitchison-normalized peak areas were subjected to a principal component analysis followed by linear discriminant analysis with leave-one-out cross validation on the first four PCs using the R package *vegan* <sup>2</sup>.

### **DNA extraction**

The reference genome is based on one colony that was kept under strict inbreeding in the lab for four generations prior to extractions. Sampled ants were ground with disposable micro-tube pestles and whole DNA was extracted with CTAB<sup>3</sup>. Extracts were treated with proteinase K and RNase H, washed twice with ethanol, dried, and finally dissolved in sterile water. We extracted DNA from 900 ants, which were pooled to be sequenced with 454 technology. Extracts of 5, 10 and 30 Brazilian males and 26 Japanese males, respectively were used for Illumina libraries.

### **DNA library preparation and sequencing**

Absorbance measurements at 260 nm and 280 nm (NanoDrop 1000) and Agilent Bioanalyzer traces were obtained for basic quality control of DNA samples designated for paired-end Illumina sequencing. Shearing of extracted DNA was performed on a Covaris S2 AFA system. For Illumina sequencing, we generated 200 and 500 bp insert libraries with Illumina's TruSeq DNA sample preparation kits from 5 µg of total DNA. Quality control and library preparation were carried out by the KFB sequencing centre of the University Regensburg, sequencing runs were performed by Illumina (Hayward, USA) on a HiSeq2000.

Quality control, library preparation, and sequencing of 8 kb and 20 kb long paired end (LPE) libraries (454, Roche) were carried out by Eurofins MWG Operon (Ebersberg, Germany). Extracted DNA was fragmented into the appropriate fragment sizes (8 kb and 20 kb) using the HydroShear DNA Shearing Device (GeneMachine). Further library preparation was performed according to "GS FLX Titanium Paired End Library Prep 20+8kb Span Method Manual" before sequencing on a GS FLX Titanium (Roche).

### **De novo genome assembly**

We generated relatively few genomic 454 reads – about 2.3x genome coverage, a single run of the sequencer. Additional coverage was provided by Illumina reads and connectivity was provided by the 8 kb and 20 kb 454 mate pairs (Supplementary Table 2). The resulting N50 scaffold and contig sizes of the assembly show that the data was sufficient for high quality assembly (Supplementary Table 13). The assembly was created with MSR-CA version 1.4 open source assembler (University of Maryland genome assembly group at <ftp://ftp.genome.umd.edu/pub/MSR-CA/>). The MSR-CA assembler combines a deBruijn graph strategy with the traditional Overlap-Layout-Consensus employed by various assembly programs for Sanger-based projects (Arachne, PCAP, CABOG, etc.). The MSR-CA uses a modified version of CABOG version 6.1 for contiging and scaffolding. The combined strategy allowed us to natively combine the short 100 bp Illumina reads and longer 454 reads in a single assembly without resorting to an approach that would require one to assemble each type of data

separately and then creating a combined assembly. Total run time for the assembly was approximately 3 days on a 16-core AMD Opteron computer with 128 Gb RAM.

Using CEGMA <sup>4</sup> on the genome sequence to assess the completeness of the assembly, we confirmed complete presence of 244 of 248 ultra-conserved genes (98.39 %). We analysed seven other published ant genomes with CEGMA and they all performed similarly well, with the draft genome of *L. humile* containing the highest number (245) of complete ultra-conserved genes. The other genomes contained 228 (*S. invicta*), 241 (*C. floridanus*), 234 (*A. cephalotes*), 243 (*A. echinator*), 243 (*P. barbartus*), and 242 (*H. saltator*) complete copies. The percentage of core eukaryotic genes with more than one complete ortholog was elevated in *C. obscurior* (23.77 %), compared to the other analyzed ant genomes (9.65 % - 12.40 %).

### **Whole RNA extraction, normalized cDNA library preparation, and transcriptome assembly**

We sampled individuals from the same BR colony that was used for the genomic DNA sequencing. Whole RNA was extracted from separate pools of eggs, the three larval stages, prepupae, pupal and different adult stages of queens, workers, ergatoid males and winged males using TRIzol (Life technologies) and subsequent Microcon purification (Millipore). Equal quantities of RNA from each extract were combined in a single pool, which was subsequently used to generate a normalized, random-primed cDNA library for emPCR-based sequencing. Sequencing was carried out on a GS FLX using Titanium series chemistry by Eurofins MWG Operon (Ebersberg, Germany), generating 1 245 994 reads (0.4 Gb).

We used the FastX toolkit ([http://hannonlab.cshl.edu/fastx\\_toolkit/](http://hannonlab.cshl.edu/fastx_toolkit/)) for quality control of raw reads and only kept high quality reads (length 10-550 bases, minimum quality scores of 20 for 70 % of the called bases). The remaining 1 122 247 reads were submitted to the reference based transcriptome assembly with Newbler v2.6 (Roche, options “-cdna -gref -ml 60 -mi 95”). We generated a total of 19 325 contigs ranging between 500 and 12 699 bases length (N50 1 155 bases) that were supplied as EST evidence to MAKER in the subsequent gene annotation.

### **Gene annotation**

MAKER version 2.20 <sup>5</sup> was run on the *C. obscurior* draft genome using the assembled transcriptome, amino acid sequence data from Swiss-prot and the ant genomes portal (Supplementary Table 14), in addition to hand-curated amino acid sequence for desaturase proteins in *Acromyrmex echinator* and *Pogonomyrmex barbatus* <sup>6</sup>. Repetitive regions were masked using a custom repeat library constructed with RepeatModeler (<http://www.repeatmasker.org/RepeatModeler.html>), all organisms in Repbase <sup>7</sup>, and a list of

known transposable elements in MAKER. *Ab initio* gene predictors (GeneMark <sup>8</sup>, Augustus <sup>9</sup>, and SNAP <sup>10</sup>) were trained on the assembly and also used by MAKER to generate gene models.

The official gene set contains 17 552 genes, of which 9 552 genes contain a known protein domain as detected by IPRScan <sup>11</sup> and 72.5 % of the genes in the final gene set have an AED (annotation edit distance) of less than 0.5, which is consistent with a well-annotated genome <sup>12</sup>. The total number of *ab silicio* predicted genes falls within the range of recent estimates for the other sequenced ant species <sup>13</sup>.

A comparison of the gene set with seven other ant genomes, *Apis mellifera* and *Nasonia vitripennis* using orthologues groups annotated with OrthoDB <sup>14</sup> revealed extensive duplication events in *Cobs* and *Nvit* (Supplementary Table 15).

### **Functional annotation of Cobs1.4 genes**

Gene Ontology (GO) term annotation for Cobs1.4 genes was done using the Blast2GO pipeline <sup>15</sup>. Predicted protein sequences for each gene were blasted against the non-redundant NCBI protein database nr (retrieved May, 3<sup>rd</sup> 2013) and parsed through Interpro scan (IPS 5-RC6, <sup>11</sup>). Blastx returned hits with e-values less than 1e-10 for ~70 % of the transcripts and 53 818 Interpro domains were annotated in 9 252 gene models. Using Blast2gPipe (v2.5, default settings), 43 166 GO terms were retrieved for 8 908 gene. We also used the Blast2go BDA system to assign provisional gene aliases for 3 415 genes. All computations were performed on the Queen Mary University of London SBCS-informatics Apocrita compute facility.

### **Repeat annotation**

Our goal was to use existing repeat prediction tools to generate *de novo* repeat libraries for several insect genomes. To this end, we implemented a pipeline that has several repetitive element prediction tools at its core.

Our pipeline combines results from RepeatModeler (v1.04) and PILER-DF <sup>16</sup>. RepeatModeler is a wrapper around two *de novo* repetitive element detection algorithms, RECON and RepeatScout. It also uses TandemRepeatsFinder <sup>17</sup> to search for simple repeats and RepeatMasker for masking and annotating repeat elements. PILER-DF is not a part of the RepeatModeler package, but is also used for repeat prediction. For both RepeatModeler and PILER-DF, the output consists of consensus sequences corresponding to repetitive elements in the input genome. Essentially, the repetitive elements found throughout the input genome are clustered into distinct repeat “families” based on similarity of sequence. A repeat “family” sequence can be thought of as a best representative consensus for all of its member sequences. Consensus sequences are then pooled into a repetitive element library for this input genome. In a latter part of the pipeline, we will use our consensus repeat library to scan our genome of interest to find repeat elements.

The first part of the pipeline involves generating repeat family sequences using the tools mentioned above. In the next part of the pipeline we (1) combined RepeatModeler and PILER results, (2) ran quality control, (3) added additional annotations for consensus repeat sequences. Combining the results of multiple prediction tools will inevitably result in duplicates. To remove duplicates, we performed an all-by-all sequence comparison of our combined repeat prediction libraries and retained only one from pairs that show 80% identity over 80% of length (length of shorter sequence).

One pitfall of repeat prediction is that false positives are often genes or gene families containing transposable element-like domains or simple repeat domains (such as the calx-beta motif). When we developed this pipeline using the genomes of various fruit flies, *L. humile* and *A. cephalotes*, we found that the native quality controls in RepeatModeler and PILER did not sufficiently filter false positives. Thus, we enforced a stricter threshold. In our current pipeline, we used the genome of *Drosophila melanogaster* as a reference to find false positives (Blastx hits with at least 50% identity over 50% length), which are removed. We arrived at these Blast parameter thresholds through a combination of Blast searches and manual curation of false positives in several genomes. Although 50/50 is a safe threshold for not including genes into a repeat library, we note that a hard sequence similarity cut-off such as ours serves as a coarse filter.

While the RepeatModeler pipeline annotates its repeat predictions using RepBase <sup>18</sup>, PILER has no such functionality. We annotated PILER consensus repeats using RepeatMasker, which uses RepBase as a reference. Additionally, we scanned all consensus repeats for the presence of long terminal repeats (LTR) or terminal inverted repeats (TIR) using custom scripts. After all annotations were updated, the final *C. obscurior* repeat library was output in FASTA and EMBL format.

For predicting repetitive elements in the *C. obscurior* genome, we added a library for *C. obscurior* generated in a first run of the pipeline to our master library consisting of the following: the latest RepBase (at the time, this was version 20121104), our *de novo* consensus repeat libraries generated from the genomes of 7 ants, 6 bees/wasps, and 12 drosophilid flies (see below) and reran the pipeline.

1. Ants – *Atta\_cephalotes*, *Acromyrmex\_echinatior*, *Camponotus\_floridanus*, *Cardiocondyla\_obscurior*, *Harpegnathos\_saltator*, *Linepithema\_humile*, *Pogonomyrmex\_barbatus*, *Solenopsis\_invictus*



2. Bees/Wasps – *Apis\_florea*, *Apis\_mellifera*, *Bombus\_terrestris*, *Megachile\_rotundata*, *Nasonia\_vitripennis*
3. Flies – *D. ananassae*, *D. erecta*, *D. grimshawi*, *D. melanogaster*, *D. mojavensis*, *D. pseudoobscura*, *D. persimilis*, *D. sechellia*, *D. simulans*, *D. virilis*, *D. willistoni*, *D. yakuba*

We used CENSOR <sup>19</sup> for reference-based annotation of repetitive elements in *C. obscurior*. Our master repeat library was used as a reference. CENSOR uses simplistic filters such as seg, xnu, and dust to search for tandem repeats. We supplemented this with our own TandemRepeatsFinder (TRF) results. All hits to our master library were recorded in a GFF3 format file.

### **Mapping of genomic reads against the Cobs1.4 reference genome**

For each lineage, we randomly sampled 140 M 100 bp reads from libraries generated from 26 (JP) and 30 (BR) male pupae. Raw reads were parsed through quality filtration and adapter trimming (Trimmomatic v0.22 ([www.usadellab.org/cms/?page=trimmomatic](http://www.usadellab.org/cms/?page=trimmomatic)), options: HEADCROP:7 LEADING:28 TRAILING:28 SLIDINGWINDOW:10:10) and mapped against the BR reference genome with BWA samse v0.5.9-r16 <sup>20</sup> in single end mode. Ambiguous reads were re-aligned with Stampy v1.0.21 <sup>21</sup> to reduce misalignments <sup>22</sup>. Aligned reads were stored in sam format.

### **De novo assembly of unmapped reads**

We extracted 23 054 888 Illumina reads generated from the JP lineage that could not be mapped against the reference genome using custom perl scripts. After filtering with Trimmomatic v0.22 (HEADCROP:7 LEADING:28 TRAILING:28 SLIDINGWINDOW:10:10), we generated *de novo* assemblies of these reads using velvetoptimizer v2.2.4 (<http://bioinformatics.net.au/software/velvetoptimiser.shtml>) with velvet 1.2.07 <sup>23</sup>. The optimised assembly contained 144 664 contigs (N50 8.7 kb, mean length 1.2 kb). We removed short contigs, contigs with extreme coverage, and contigs returning Blastn hits against the BR raw draft assembly with an e-value < 1e-10, leaving a final set of 4 108 contigs (N50 0.4 kb, mean length 0.34 kb) not present in the BR genome assembly. These contigs were blasted (Blastx) against NCBI's non-redundant database (retrieved May, 3<sup>rd</sup> 2013) and against the Cobs1.4 proteins. Contigs without hits below an e-value of 1e-10 in eukaryotes or with hits against a Cobs1.4 protein (e-value below 1e-10) were removed, producing a set of 17 contigs containing an open-reading frame that are only present in the JP genome.

### **Calculation of sliding windows**

One kb windows of different stats (TEs, exons, SNPs, coverage) were calculated for all scaffolds based on GFF, VCF, and SAM files. For GFF and VCF files, custom bash and perl scripts were used to calculate TE and exon bases per 1 kb, and variant calls (see below) per 1 kb. Coverage per 1 kb was calculated from SAM files, using samtools' depth algorithm <sup>24</sup> and custom bash and perl scripts. Subsequent processing, calculating of 200 kb sliding windows, and plotting of the data was performed with R v3.0.0 (r-project.org).

### **Detection of small-scale genomic structural variants**

To identify differences in the genome affecting genes, we filtered 1 kb windows (see above) where log<sub>2</sub> coverage ratio (BR/JP) was below -0.8 or above 0.8. Values below -0.8 suggest either regions of low coverage in BR or regions of elevated coverage in JP, *vice versa* for values above 0.8. We applied a second filter based on exon and TE content of each individual window and selected only those windows containing more annotated exon than TE bases, thus focusing on windows dominated by exonic over transposon sequence. A list of candidate genes was compiled based on intersection of the MAKER annotation with the list of candidate 1 kb windows. The absolute base-wise coverage for BR and JP as well as the log<sub>2</sub> coverage ratio were plotted against the genomic position and candidate genes were manually inspected and classified as either partial or full gene deletions or duplications.

Experimental proof-of-principle was conducted by PCR and Sanger sequencing for two deletion candidates (*Cobs\_13563* and *Cobs\_01070*) and by real-time quantitative PCR for four duplication candidates (*Cobs\_13806*, *Cobs\_17872*, *Cobs\_13486*, and *Cobs\_16853*) (see Supplementary Figure 7). For deletion candidates, we designed primers spanning the putative deletion and performed PCR on extracted genomic DNA for both lineages. PCR products were purified and Sanger sequenced to confirm the deletion. For duplication candidates, we designed primers within the putative duplicated genomic sequences and performed qPCR experiments (normalization against a single copy gene (*actin*, *Cobs\_04257*)) on genomic DNA, isolated from three different colonies of each population. By calculating the ratio of normalized relative quantities between BR and JP copy number variations were confirmed.

### **Variant calling**

Single nucleotide variant and InDel calling was carried out combining samtools <sup>24</sup> and the GATK <sup>25,26</sup>, retaining only those variants called consistently by both tools. Potential PCR duplicates were marked with Picard MarkDuplicates (<http://picard.sourceforge.net/>). Raw variant calls were produced with the GATK after local realignment around InDels. Subsequently, all calls were annotated and filtered; producing sets of high and low confidence SNVs and InDels,

respectively. The set of high confidence SNVs was used to train the GATK's VariantRecalibrator for variant quality score recalibration to filter additional SNVs from raw variant calls. The final set produced with the GATK consisted of 783 009 called single nucleotide variants and 168 754 InDels.

Raw variant calls produced by samtools were filtered based on mapping quality and genotype quality ( $Q > 29$ ,  $GQ > 31$ ), resulting in a set of 601 214 SNVs and 151 656 InDels.

A total of 567 552 SNVs and 68 430 InDels were called consistently by both tools. The transition from Cobs1.3 to Cobs1.4 removed contaminating endosymbiotic scaffolds, resulting in a final variant set of 553 052 SNVs and 67 987 InDels stored in a single VCF file. Single nucleotide variants were annotated with SNPeff<sup>27</sup> to identify non-synonymous and synonymous substitutions.

### **Gene Ontology enrichment**

To test for enrichment or depletion of certain GO terms in genes in TE islands, we performed a two-tailed GO enrichment analysis. The Gossip package<sup>28</sup>, implemented in Blast2go, uses Fisher's Exact Test for each GO term and corrects for multiple testing. GO terms with  $FDR < 0.05$  were considered to be significantly enriched/depleted in the test set.

### **Enrichment of Transposable Element superfamilies**

Similarly to the GO enrichment analyses, we tested all TE superfamilies for enrichment in TE islands. We performed one-tailed Fisher's Exact Tests for each superfamily in TE islands, testing for significant enrichment of copy numbers and in a second test for enrichment of total bases compared to other superfamilies in TE islands. We applied FDR corrections for multiple testing and considered all TE superfamilies to be significantly enriched in copy number or base count with an  $FDR < 0.05$ .

### **Gene expression analysis with RNAseq**

We extracted whole RNA from 7 individual mated queens of the same age (4 weeks after pupal molt) and 7 individual developing queens in the early 3<sup>rd</sup> larval instar (11-13 days). To sample larvae, we set up experimental colonies consisting of 20 workers and 20 to 30 methoprene-treated eggs, as queen development can be induced by treatment with low concentrations of the JH-analogue<sup>29</sup>. Unsampled larvae from these colonies were kept alive to confirm the exclusive development of queen pupae. Sampled queens and larvae were placed individually in 1.5 ml eppendorf tubes, snap-frozen in liquid nitrogen, and kept at  $-80^{\circ}\text{C}$  till further processing.

We extracted whole RNA with the RNeasy Plus Micro kit (Qiagen) yielding 27 to 153 ng per individual larvae and 57 to 122 ng per individual queen. Single end Illumina libraries from amplified RNA (Ovation RNaseq system V2) were generated following the manufacturers protocol (Ovation Rapid Multiplexsystem, NuGEN). Sequencing on an Illumina HiSeq1000 at the in-house sequencing centre (KFB, Regensburg, Germany) generated ~20 M 100 bp reads per sample (Supplementary Table 16). Raw reads were filtered for adapter contamination (cutadapt, <sup>30</sup>), parsed through quality filtration (Trimmomatic v0.27, options: LEADING:10 TRAILING:10 SLIDING:4:10 MINLEN:15), and mapped against the reference genome using the tophat2 (v2.0.8) and bowtie2 (v2.1.0) package (<sup>31,32</sup>, --b2-sensitive mode, mapping rate ~50 %). Low mapping rates are most likely a consequence of the required amplification step during library preparation. Gene expression analysis was carried out with DESeq2 <sup>33</sup>, based on count tables produced with HTSeq <sup>34</sup> against the Cobs1.4 MAKER annotation (Supplementary Table 16). Genes were considered to be differentially expressed at an FDR < 0.05 and expression values are reported as untransformed base means of read counts per treatment group, after correcting for library size differences (“size factor normalization”).

### **Calculation of exon wide CpG o/e values**

Observed to expected CpG values for all exons were calculated as <sup>35</sup>:

$$\frac{Obs}{Exp} CpG = \frac{n_{CpG}}{n_C \times n_G} \times N \quad (1)$$

where N is the total number of nucleotides in the analysed exon.

## Supplementary References

1. Carlson, D. A., Bernier, U. R. & Sutton, B. D. Elution patterns from capillary GC for methyl-branched alkanes. *J. Chem. Ecol.* **24**, 1845–1865 (1998).
2. Oksanen, J. *et al.* Package ‘vegan’. (2013).
3. Sambrook, J. & Russell, D. W. *Molecular Cloning*. (CSHL Press, 2001).
4. Parra, G., Bradnam, K. & Korf, I. CEGMA: a pipeline to accurately annotate core genes in eukaryotic genomes. *Bioinformatics* **23**, 1061–1067 (2007).
5. Cantarel, B. L. *et al.* MAKER: An easy-to-use annotation pipeline designed for emerging model organism genomes. *Genome Res.* **18**, 188–196 (2007).
6. Simola, D. F. *et al.* Social insect genomes exhibit dramatic evolution in gene composition and regulation while preserving regulatory features linked to sociality. *Genome Res.* **23**, 1235–1247 (2013).
7. Jurka, J. *et al.* Repbase Update, a database of eukaryotic repetitive elements. *Cytogenet. Genome Res.* **110**, 462–467 (2005).
8. Ter-Hovhannisyan, V., Lomsadze, A., Chernoff, Y. O. & Borodovsky, M. Gene prediction in novel fungal genomes using an ab initio algorithm with unsupervised training. *Genome Res.* **18**, 1979–1990 (2008).
9. Stanke, M., Schöffmann, O., Morgenstern, B. & Waack, S. Gene prediction in eukaryotes with a generalized hidden Markov model that uses hints from external sources. *BMC Bioinformatics* **7**, 62 (2006).
10. Korf, I. Gene finding in novel genomes. *BMC Bioinformatics* **5**, 59 (2004).
11. Quevillon, E. *et al.* InterProScan: protein domains identifier. *Nucleic Acids Res.* **33**, W116–W120 (2005).
12. Holt, C. & Yandell, M. MAKER2: an annotation pipeline and genome-database management tool for second-generation genome projects. *BMC Bioinformatics* **12**, 491–491 (2010).
13. Wissler, L., Gadau, J., Simola, D. F., Helmkampf, M. & Bornberg-Bauer, E. Mechanisms and dynamics of orphan gene emergence in insect genomes. *Genome Biol. Evol.* **5**, 439–455 (2013).
14. Waterhouse, R. M., Tegenfeldt, F., Li, J., Zdobnov, E. M., Kriventseva, E. V. OrthoDB: a hierarchical catalog of animal, fungal and bacterial orthologs. *Nucleic Acids Res.* **41**, D358–65 (2013).
15. Conesa, A. & Götz, S. Blast2GO: A Comprehensive Suite for Functional Analysis in Plant Genomics. *Int. J. Plant Genomics* **2008**, 1–12 (2008).
16. Edgar, R. C. & Myers, E. W. PILER: identification and classification of genomic repeats. *Bioinformatics* **21**, i152–i158 (2005).
17. Benson, G. Tandem repeats finder: a program to analyze DNA sequences. *Nucleic Acids Res.* **27**, 573–580 (1999).
18. Smith, C. D. *et al.* Improved repeat identification and masking in Dipterans. *Gene* **389**, 1–9 (2007).
19. Kohany, O., Gentles, A. J., Hankus, L. & Jurka, J. Annotation, submission and screening of repetitive elements in Repbase: RepbaseSubmitter and Censor. *BMC Bioinformatics* **7**, 474 (2006).
20. Li, H. & Durbin, R. Fast and accurate long-read alignment with Burrows-Wheeler transform. *Bioinformatics* **26**, 589–595 (2010).
21. Lunter, G. & Goodson, M. Stampy: A statistical algorithm for sensitive and fast mapping of Illumina sequence reads. *Genome Res.* **21**, 936–939 (2011).
22. Nielsen, R., Paul, J. S., Albrechtsen, A. & Song, Y. S. Genotype and SNP calling from next-generation sequencing data. *Nat. Rev. Gen.* **12**, 443–451 (2011).
23. Zerbino, D. R. & Birney, E. Velvet: Algorithms for de novo short read assembly using de Bruijn graphs. *Genome Res.* **18**, 821–829 (2008).
24. Li, H. A statistical framework for SNP calling, mutation discovery, association mapping and population genetical parameter estimation from sequencing data. *Bioinformatics* **27**, 2987–2993 (2011).
25. McKenna, A. *et al.* The Genome Analysis Toolkit: A MapReduce framework for analyzing next-generation DNA sequencing data. *Genome Res.* **20**, 1297–1303 (2010).
26. DePristo, M. A. *et al.* A framework for variation discovery and genotyping using next-generation DNA sequencing data. *Nat. Genet.* **43**, 491–498 (2011).
27. Cingolani, P. *et al.* A program for annotating and predicting the effects of single nucleotide polymorphisms, SnpEff: SNPs in the genome of *Drosophila melanogaster* strain w1118; iso-2; iso-3. *Fly* **6**, 80–92 (2012).
28. Blüthgen, N. *et al.* Biological profiling of gene groups utilizing Gene Ontology. *Genome Inform.* **16**, 106–115 (2005).
29. Schrepf, A. & Heinze, J. Proximate mechanisms of male morph determination in the ant

- Cardiocondyla obscurior*. *Evol. Dev.* **8**, 266–272 (2006).
30. Martin, M. Cutadapt removes adapter sequences from high-throughput sequencing reads. *EMBnet journal* (2011).
  31. Kim, D. *et al.* TopHat2: accurate alignment of transcriptomes in the presence of insertions, deletions and gene fusions. *Genome Biol.* **14**, R36 (2013).
  32. Langmead, B. & Salzberg, S. L. Fast gapped-read alignment with Bowtie 2. *Nat. Methods* **9**, 357–359 (2012).
  33. Love, M. I., Huber, W. & Anders, S. Moderated estimation of fold change and dispersion for RNA-Seq data with DESeq2. *bioRxiv* (2014).
  34. Anders, S. HTSeq: Analysing high-throughput sequencing data with Python. URL <http://www-huber.embl.de/users/anders/HTSeq/doc/overview.html> (2010).
  35. Glastad, K. M., Hunt, B. G. & Goodisman, M. A. D. Evidence of a conserved functional role for DNA methylation in termites. *Insect Mol. Biol.* **22**, 143–154 (2012).
